# Supplementary material for: Post-mortem enamel surface texture alteration during taphonomic processes—do experimental approaches reflect natural phenomena?
Source: PeerJ. 2022 Jan 14;10:e12635. doi: 10.7717/peerj.12635 (PMC8763041; doi:10.7717/peerj.12635)
Supplement: Supplemental Information 2 [file peerj-10-12635-s002.xlsx]

## Sheet: Table S1
Table S1: Grain size fraction with mean and median of the quartz-bearing sand used for the tumbling experiment (measured before and after tumbling) and Feinsand 12c and loess used for the sanblasting experiment, measured by laser granulometry.
	< 0,2 µm [%]	< 0,63 µm [%]	< 2 µm [%]	< 6,3 µm [%]	< 20 µm [%]	< 36 µm [%]	< 63 µm [%]	< 200 µm [%]	< 630 µm [%]	< 2000 µm [%]	mean [µm]	median [µm]
51–168 μm before tumbling	0.0320509	0.279049	0.853051	0.501642	0.623919	2.41574	11.9355	78.7113	4.64773	0	105.856	101.203
112–292 μm before tumbling	0.118971	0.296027	0.441131	0.205008	0.140308	0.235367	1.17971	47.777	49.6064	1.43051e-06	200.937	200.36
221–513 μm before tumbling	0.0953181	0.199743	0.217571	0.0762646	0.0576774	0.0402714	0.100124	6.62531	90.4984	2.08937	359.239	353.446
51–168 μm after tumbling	0.0033056	0.272827	1.388	1.9804	3.10958	3.64851	12.7095	74.2027	2.68514	0	95.7984	94.6166
112–292 μm after tumbling	0.135367	0.342632	0.545839	0.521247	0.755071	0.552937	0.8017	42.5169	53.8283	0	205.96	207.574
221–513 μm after tumbling	0.0918929	0.188273	0.195647	0.072325	0.0852799	0.0614241	0.0900418	4.06915	92.4493	2.69665	375.827	369.222
Feinsand 12c	0.119394	0.323203	0.517284	0.179606	0.108572	0.320859	1.39607	71.7158	25.3192	0	166.007	164.314
Loess Schwalbenberg	1.16364	2.97378	4.51053	6.8773	16.8704	23.8074	28.2388	15.4559	0.102226	0	36.8649	31.971

## Sheet: Table S2
Table S2: Taxon, amount, information about collection, fossil side and teeth samples and different experimental set ups. n.a. = information not available.
Taxon	Trivial Name	Sample ID	Collection	Fossil side	Jaw	Side	Tooth position	Facet	Quality	MountainsMap template	Tumbling experiment		Acid etching experiment				Sandblasting experiment
											Treatment	Duration [hrs]	pH value	Acid [ml]	Temperature [°C]	Duration [hrs]	Sediment grain size fraction	Blasting interval [sec]
Equus sp.	zebra		Zoological Museum Hamburg, CeNak, Germany	-	tx	right	M2	3	original	Mammal template	51–168 μm	336	-	-	-	-	-	-
Equus sp.	zebra		Zoological Museum Hamburg, CeNak, Germany	-	tx	right	M1	1	original	Mammal template	51–168 μm		-	-	-	-	-	-
Equus sp.	zebra		Zoological Museum Hamburg, CeNak, Germany	-	tx	left	M2	1	original	Mammal template	51–168 μm		-	-	-	-	-	-
Equus sp.	zebra		Zoological Museum Hamburg, CeNak, Germany	-	tx	left	P4	1	original	Mammal template	112–292 μm		-	-	-	-	-	-
Equus sp.	zebra		Zoological Museum Hamburg, CeNak, Germany	-	tx	right	P4	1	original	Mammal template	112–292 μm		-	-	-	-	-	-
Equus sp.	zebra		Zoological Museum Hamburg, CeNak, Germany	-	tx	left	M1	3	original	Mammal template	112–292 μm		-	-	-	-	-	-
Equus sp.	zebra		Zoological Museum Hamburg, CeNak, Germany	-	tx	left	P3	1	original	Mammal template	221–513 μm		-	-	-	-	-	-
Equus sp.	zebra		Zoological Museum Hamburg, CeNak, Germany	-	tx	right	P3	3	original	Mammal template	221–513 μm		-	-	-	-	-	-
Equus sp.	zebra		Zoological Museum Hamburg, CeNak, Germany	-	tx	left	P2	1	original	Mammal template	221–513 μm		-	-	-	-	-	-
Equus sp.	zebra		Zoological Museum Hamburg, CeNak, Germany	-	tx	left	M3	2	original	Mammal template	2-8 mm		-	-	-	-	-	-
Equus sp.	zebra		Zoological Museum Hamburg, CeNak, Germany	-	tx	right	M3	3	original	Mammal template	2-8 mm		-	-	-	-	-	-
Equus sp.	zebra		Zoological Museum Hamburg, CeNak, Germany	-	tx	right	M1	3	original	Mammal template	2-8 mm		-	-	-	-	-	-
Capreolus capreolus	roe deer		Zoological Museum Hamburg, CeNak, Germany	-	tx	left	M1	2	original	Mammal template	51–168 μm	336	-	-	-	-	-	-
Capreolus capreolus	roe deer		Zoological Museum Hamburg, CeNak, Germany	-	tx	left	P2	3	original	Mammal template	51–168 μm		-	-	-	-	-	-
Capreolus capreolus	roe deer		Zoological Museum Hamburg, CeNak, Germany	-	tx	right	M3	1	mould	Mammal template	51–168 μm		-	-	-	-	-	-
Capreolus capreolus	roe deer		Zoological Museum Hamburg, CeNak, Germany	-	tx	left	M2	3	original	Mammal template	112–292 μm		-	-	-	-	-	-
Capreolus capreolus	roe deer		Zoological Museum Hamburg, CeNak, Germany	-	tx	left	P3	4	original	Mammal template	112–292 μm		-	-	-	-	-	-
Capreolus capreolus	roe deer		Zoological Museum Hamburg, CeNak, Germany	-	tx	right	P4	1	original	Mammal template	112–292 μm		-	-	-	-	-	-
Capreolus capreolus	roe deer		Zoological Museum Hamburg, CeNak, Germany	-	tx	left	M3	4	original	Mammal template	221–513 μm		-	-	-	-	-	-
Capreolus capreolus	roe deer		Zoological Museum Hamburg, CeNak, Germany	-	tx	left	P4	4	original	Mammal template	221–513 μm		-	-	-	-	-	-
Capreolus capreolus	roe deer		Zoological Museum Hamburg, CeNak, Germany	-	tx	right	M1	3	original	Mammal template	221–513 μm		-	-	-	-	-	-
Capreolus capreolus	roe deer		Zoological Museum Hamburg, CeNak, Germany	-	tx	right	M2	4	original	Mammal template	2-8 mm		-	-	-	-	-	-
Capreolus capreolus	roe deer		Zoological Museum Hamburg, CeNak, Germany	-	tx	right	P2	4	original	Mammal template	2-8 mm		-	-	-	-	-	-
Capreolus capreolus	roe deer		Zoological Museum Hamburg, CeNak, Germany	-	tx	right	P3	4	original	Mammal template	2-8 mm		-	-	-	-	-	-
Otomys sp.	African vlei rats	A	Senckenberg Museum, Frankfurt, Germany	-	n.a.	n.a.	n.a.	L1	original	Otomys template	51–168 μm	336	-	-	-	-	-	-
Otomys sp.	African vlei rats	K	Senckenberg Museum, Frankfurt, Germany	-	n.a.	n.a.	n.a.	L1	original	Otomys template	51–168 μm		-	-	-	-	-	-
Otomys sp.	African vlei rats	D	Senckenberg Museum, Frankfurt, Germany	-	n.a.	n.a.	n.a.	L2	original	Otomys template	51–168 μm		-	-	-	-	-	-
Otomys sp.	African vlei rats	J	Senckenberg Museum, Frankfurt, Germany	-	n.a.	n.a.	n.a.	L1	original	Otomys template	112–292 μm		1.3	0.08	45	12	-	-
Otomys sp.	African vlei rats	I	Senckenberg Museum, Frankfurt, Germany	-	n.a.	n.a.	n.a.	L2	original	Otomys template	112–292 μm		1.3	0.12	45	12	-	-
Otomys sp.	African vlei rats	E	Senckenberg Museum, Frankfurt, Germany	-	n.a.	n.a.	n.a.	L2	original	Otomys template	112–292 μm		1.3	0.19	45	12	-	-
Otomys sp.	African vlei rats	B	Senckenberg Museum, Frankfurt, Germany	-	n.a.	n.a.	n.a.	L1	original	Otomys template	221–513 μm		-	-	-	-	-	-
Otomys sp.	African vlei rats	C	Senckenberg Museum, Frankfurt, Germany	-	n.a.	n.a.	n.a.	L1	original	Otomys template	221–513 μm		-	-	-	-	-	-
Otomys sp.	African vlei rats	L	Senckenberg Museum, Frankfurt, Germany	-	n.a.	n.a.	n.a.	L1	original	Otomys template	221–513 μm		-	-	-	-	-	-
Otomys sp.	African vlei rats	F	Senckenberg Museum, Frankfurt, Germany	-	n.a.	n.a.	n.a.	L1	original	Otomys template	2-8 mm		-	-	-	-	-	-
Otomys sp.	African vlei rats	G	Senckenberg Museum, Frankfurt, Germany	-	n.a.	n.a.	n.a.	L1	original	Otomys template	2-8 mm		-	-	-	-	-	-
Crocodilus niloticus	Nile crocodile	G	Pierre Latte Fermes aux Crocodile, France	-	n.a.	n.a.	n.a.	n.a.	original	Reptile/shark template	51–168 μm	336	-	-	-	-	-	-
Crocodilus niloticus	Nile crocodile	H	Pierre Latte Fermes aux Crocodile, France	-	n.a.	n.a.	n.a.	n.a.	original	Reptile/shark template	51–168 μm		-	-	-	-	-	-
Crocodilus niloticus	Nile crocodile	I	Pierre Latte Fermes aux Crocodile, France	-	n.a.	n.a.	n.a.	n.a.	original	Reptile/shark template	51–168 μm		-	-	-	-	-	-
Crocodilus niloticus	Nile crocodile	D	Pierre Latte Fermes aux Crocodile, France	-	n.a.	n.a.	n.a.	n.a.	original	Reptile/shark template	112–292 μm		2	8.06	25	72	-	-
Crocodilus niloticus	Nile crocodile	E	Pierre Latte Fermes aux Crocodile, France	-	n.a.	n.a.	n.a.	n.a.	original	Reptile/shark template	112–292 μm		2	5.73	25	72	-	-
Crocodilus niloticus	Nile crocodile	F	Pierre Latte Fermes aux Crocodile, France	-	n.a.	n.a.	n.a.	n.a.	original	Reptile/shark template	112–292 μm		2	11.51	25	72	-	-
Crocodilus niloticus	Nile crocodile	A	Pierre Latte Fermes aux Crocodile, France	-	n.a.	n.a.	n.a.	n.a.	original	Reptile/shark template	221–513 μm		-	-	-	-	-	-
Crocodilus niloticus	Nile crocodile	B	Pierre Latte Fermes aux Crocodile, France	-	n.a.	n.a.	n.a.	n.a.	original	Reptile/shark template	221–513 μm		-	-	-	-	-	-
Crocodilus niloticus	Nile crocodile	C	Pierre Latte Fermes aux Crocodile, France	-	n.a.	n.a.	n.a.	n.a.	original	Reptile/shark template	221–513 μm		-	-	-	-	-	-
Crocodilus niloticus	Nile crocodile	J	Pierre Latte Fermes aux Crocodile, France	-	n.a.	n.a.	n.a.	n.a.	original	Reptile/shark template	2-8 mm		-	-	-	-	-	-
Crocodilus niloticus	Nile crocodile	K	Pierre Latte Fermes aux Crocodile, France	-	n.a.	n.a.	n.a.	n.a.	original	Reptile/shark template	2-8 mm		-	-	-	-	-	-
Crocodilus niloticus	Nile crocodile	L	Pierre Latte Fermes aux Crocodile, France	-	n.a.	n.a.	n.a.	n.a.	original	Reptile/shark template	2-8 mm		-	-	-	-	-	-
Carcharhinus plumbeus	sandbar shark	B	Blackpool Sea Life, England	-	n.a.	n.a.	n.a.	n.a.	original	Reptile/shark template	51–168 μm	336	-	-	-	-	-	-
Carcharhinus plumbeus	sandbar shark	F	Blackpool Sea Life, England	-	n.a.	n.a.	n.a.	n.a.	original	Reptile/shark template	51–168 μm		-	-	-	-	-	-
Carcharhinus plumbeus	sandbar shark	J	Blackpool Sea Life, England	-	n.a.	n.a.	n.a.	n.a.	original	Reptile/shark template	51–168 μm		-	-	-	-	-	-
Carcharhinus plumbeus	sandbar shark	A	Blackpool Sea Life, England	-	n.a.	n.a.	n.a.	n.a.	original	Reptile/shark template	112–292 μm		2	1.25	25	48	-	-
Carcharhinus plumbeus	sandbar shark	E	Blackpool Sea Life, England	-	n.a.	n.a.	n.a.	n.a.	original	Reptile/shark template	112–292 μm		2	0.61	25	48	-	-
Carcharhinus plumbeus	sandbar shark	I	Blackpool Sea Life, England	-	n.a.	n.a.	n.a.	n.a.	original	Reptile/shark template	112–292 μm		2	0.92	25	48	-	-
Carcharhinus plumbeus	sandbar shark	D	Blackpool Sea Life, England	-	n.a.	n.a.	n.a.	n.a.	original	Reptile/shark template	221–513 μm		-	-	-	-	-	-
Carcharhinus plumbeus	sandbar shark	M	Blackpool Sea Life, England	-	n.a.	n.a.	n.a.	n.a.	original	Reptile/shark template	221–513 μm		-	-	-	-	-	-
Carcharhinus plumbeus	sandbar shark	L	Blackpool Sea Life, England	-	n.a.	n.a.	n.a.	n.a.	original	Reptile/shark template	221–513 μm		-	-	-	-	-	-
Carcharhinus plumbeus	sandbar shark	C	Blackpool Sea Life, England	-	n.a.	n.a.	n.a.	n.a.	original	Reptile/shark template	2-8 mm		-	-	-	-	-	-
Carcharhinus plumbeus	sandbar shark	G	Blackpool Sea Life, England	-	n.a.	n.a.	n.a.	n.a.	original	Reptile/shark template	2-8 mm		-	-	-	-	-	-
Carcharhinus plumbeus	sandbar shark	K	Blackpool Sea Life, England	-	n.a.	n.a.	n.a.	n.a.	original	Reptile/shark template	2-8 mm		-	-	-	-	-	-
Mammuthus sp.	mammoth	n.a.	Geoskop Kusel, Germany	Rhine river sediments, Germany	n.a.	n.a.	n.a.	n.a.	original	Mammal template	-	-	-	-	-	-	6.3–200 µm	7; 14
Mammuthus sp.	mammoth	n.a.	Geoskop Kusel, Germany	Rhine river sediments, Germany	n.a.	n.a.	n.a.	n.a.	original	Mammal template	-	-	-	-	-	-	6.3–200 µm	7; 14
Mammuthus sp.	mammoth	n.a.	Geoskop Kusel, Germany	Rhine river sediments, Germany	n.a.	n.a.	n.a.	n.a.	original	Mammal template	-	-	-	-	-	-	6.3–200 µm	7; 14
Mammuthus sp.	mammoth	n.a.	Geoskop Kusel, Germany	Rhine river sediments, Germany	n.a.	n.a.	n.a.	n.a.	original	Mammal template	-	-	-	-	-	-	63–630 µm	7
Mammuthus sp.	mammoth	n.a.	Geoskop Kusel, Germany	Rhine river sediments, Germany	n.a.	n.a.	n.a.	n.a.	original	Mammal template	-	-	-	-	-	-	63–630 µm	7
Mammuthus sp.	mammoth	n.a.	Geoskop Kusel, Germany	Rhine river sediments, Germany	n.a.	n.a.	n.a.	n.a.	original	Mammal template	-	-	-	-	-	-	63–630 µm	7
Hippotherium primigenium		DIN2484	Hessische Landesmuseum Darmstadt, Germany	Dinotherien Sande, Germany	tx	left	M2	#a2p	original	Mammal template	-	-	-	-	-	-	-	-
Hippotherium primigenium		DIN2682	Hessische Landesmuseum Darmstadt, Germany	Dinotherien Sande, Germany	tx	left	M2	#a2p	original	Mammal template	-	-	-	-	-	-	-	-
Hippotherium primigenium		DIN2712	Hessische Landesmuseum Darmstadt, Germany	Dinotherien Sande, Germany	tx	left	M2	#a2p	original	Mammal template	-	-	-	-	-	-	-	-
Hippotherium primigenium		DIN2817	Hessische Landesmuseum Darmstadt, Germany	Dinotherien Sande, Germany	tx	left	M2	#a2p	original	Mammal template	-	-	-	-	-	-	-	-
Hippotherium primigenium		DIN2960	Hessische Landesmuseum Darmstadt, Germany	Dinotherien Sande, Germany	tx	left	M2	#a2p	original	Mammal template	-	-	-	-	-	-	-	-
Hippotherium primigenium		DIN3177	Hessische Landesmuseum Darmstadt, Germany	Dinotherien Sande, Germany	tx	left	M2	#a2p	original	Mammal template	-	-	-	-	-	-	-	-
Hippotherium primigenium		DIN2484	Hessische Landesmuseum Darmstadt, Germany	Dinotherien Sande, Germany	tx	right	M2	#a2p	original	Mammal template	-	-	-	-	-	-	-	-
Hippotherium primigenium		DIN2861	Hessische Landesmuseum Darmstadt, Germany	Dinotherien Sande, Germany	tx	right	M2	#a2p	original	Mammal template	-	-	-	-	-	-	-	-
Antelope	Antelope	M749934		Chad	tx	left	M2	#p2a	original	Mammal template	-	-	-	-	-	-	-	-
Antelope	Antelope	TM293.02.158		Chad	tm	left	m2	#p4a	original	Mammal template	-	-	-	-	-	-	-	-
Antelope	Antelope	M6099020		Chad	tx	right	M2	#a2p	original	Mammal template	-	-	-	-	-	-	-	-
Antelope	Antelope	TM266.01.133		Chad	tm	right	m2	#a4p	original	Mammal template	-	-	-	-	-	-	-	-
Otomys sp.	African vlei rats	CSM#13	Collection of Jennifer Leichliter	Cradle of Humankind World Heritage Site	tx	right	M3	n.a.	original	Otomys template	-	-	-	-	-	-	-	-
Otomys sp.	African vlei rats	CSM#19	Collection of Jennifer Leichliter	Cradle of Humankind World Heritage Site	tx	right	M3	n.a.	original	Otomys template	-	-	-	-	-	-	-	-
Otomys sp.	African vlei rats	CSM#23	Collection of Jennifer Leichliter	Cradle of Humankind World Heritage Site	tx	right	M3	n.a.	original	Otomys template	-	-	-	-	-	-	-	-
Otomys sp.	African vlei rats	CSM#299	Collection of Jennifer Leichliter	Cradle of Humankind World Heritage Site	tx	right	M3	n.a.	original	Otomys template	-	-	-	-	-	-	-	-
Otomys sp.	African vlei rats	CSM#30	Collection of Jennifer Leichliter	Cradle of Humankind World Heritage Site	tx	right	M3	n.a.	original	Otomys template	-	-	-	-	-	-	-	-
Otomys sp.	African vlei rats	CSM#310	Collection of Jennifer Leichliter	Cradle of Humankind World Heritage Site	tx	right	M3	n.a.	original	Otomys template	-	-	-	-	-	-	-	-
Otomys sp.	African vlei rats	CSM#323	Collection of Jennifer Leichliter	Cradle of Humankind World Heritage Site	tx	right	M3	n.a.	original	Otomys template	-	-	-	-	-	-	-	-
Otomys sp.	African vlei rats	CSM#41	Collection of Jennifer Leichliter	Cradle of Humankind World Heritage Site	tx	right	M3	n.a.	original	Otomys template	-	-	-	-	-	-	-	-
Otomys irroratus	Southern African vlei rat	Pellet#17	Collection of Jennifer Leichliter	Cradle of Humankind World Heritage Site	tx	right	M3	n.a.	original	Otomys template	-	-	-	-	-	-	-	-
Otomys irroratus	Southern African vlei rat	Pellet#1	Collection of Jennifer Leichliter	Cradle of Humankind World Heritage Site	tx	right	M3	n.a.	original	Otomys template	-	-	-	-	-	-	-	-
Otomys irroratus	Southern African vlei rat	Pellet#22	Collection of Jennifer Leichliter	Cradle of Humankind World Heritage Site	tx	right	M3	n.a.	original	Otomys template	-	-	-	-	-	-	-	-
Otomys irroratus	Southern African vlei rat	Pellet#51	Collection of Jennifer Leichliter	Cradle of Humankind World Heritage Site	tx	right	M3	n.a.	original	Otomys template	-	-	-	-	-	-	-	-
Otomys irroratus	Southern African vlei rat	Pellet#52	Collection of Jennifer Leichliter	Cradle of Humankind World Heritage Site	tx	right	M3	n.a.	original	Otomys template	-	-	-	-	-	-	-	-
Otomys irroratus	Southern African vlei rat	Pellet#53	Collection of Jennifer Leichliter	Cradle of Humankind World Heritage Site	tx	right	M3	n.a.	original	Otomys template	-	-	-	-	-	-	-	-
Otomys irroratus	Southern African vlei rat	Pellet#57	Collection of Jennifer Leichliter	Cradle of Humankind World Heritage Site	tx	right	M3	n.a.	original	Otomys template	-	-	-	-	-	-	-	-
Otomys irroratus	Southern African vlei rat	Pellet#7	Collection of Jennifer Leichliter	Cradle of Humankind World Heritage Site	tx	right	M3	n.a.	original	Otomys template	-	-	-	-	-	-	-	-

## Sheet: Table S3
Table S3: Description of applied surface texture parameters according to ISO 25178, ISO 12781, motif, furrow, texture direction and isotropy.
Category	Parameter	Description (condition)	Standard	Unit
Area	Sda	Closed dale area	ISO 25178	µm 2
	Sha	Closed hill area	ISO 25178	µm 2
	mea	Mean area	Motif	µm 2
Complexity	Sdr	Developed interfacial area ratio	ISO 25178	%
	nMotif	Number of motifs	Motif	no unit
	Asfc	Fractal complexity (Area-sale)	SSFA	no unit
Density	Sal	Auto-correlation length (s = 0.2)	ISO 25178	µm
	Spd	Density of peaks	ISO 25178	1/ µm 2
	medf	Mean density of furrows	Furrow	cm/cm2
Direction	Str	Texture aspect ratio (s = 0.2)	ISO 25178	no unit
	Std	Texture direction	ISO 25178	no unit
	Tr1R	First direction	Direction	no unit
	Tr2R	Second direction	Direction	no unit
	Tr3R	Third direction	Direction	no unit
	IsT	Texture isotropy	Isotropy	%
	epLsar	Length-sale anisotropy	SSFA	no unit
Height	S10z	Ten-point height	ISO 25178	µm
	S5p	Five-point peak height	ISO 25178	µm
	S5v	Five-point valley height	ISO 25178	µm
	Sa	Arithmetic mean height or mean surface roughness	ISO 25178	µm
	Sku	Kurtosis of the height distribution	ISO 25178	no unit
	Sp	Maximum peak height, height between the highest peak and the mean plane	ISO 25178	µm
	Sq	Standard deviation of the height distribution or RMS surface roughness	ISO 25178	µm
	Ssk	Skewness of the height distribution	ISO 25178	no unit
	Sv	Maximum pit height, depth between the mean plane and the deepest valley	ISO 25178	µm
	Sxp	Peak extreme height difference in height between p% and q% (p=50%, q=97.5%)	ISO 25178	µm
	Sz	Maximum height, height between the highest peak and the deepest valley	ISO 25178	µm
	meh	Mean height	Motif	µm
	madf	Maximum depth of furrows	Furrow	µm
	metf	Mean depth of furrows	Furrow	µm
	FLTt	Peak to valley ﬂatness deviation of the surface (Gaussian Filter, 0.025 mm)	ISO 12781	µm
	FLTp	Peak to reference ﬂatness deviation (Gaussian Filter, 0.025 mm)	ISO 12781	µm
	FLTv	Reference to valley ﬂatness deviation (Gaussian Filter, 0.025 mm)	ISO 12781	µm
	FLTq	Root mean square ﬂatness deviation (Gaussian Filter, 0.025 mm)	ISO 12781	µm
Peak sharpness	Spc	Arithmetic mean peak curvature	ISO 25178	1/µm
Plateau size	Smr	Areal material ratio	ISO 25178	%
	Smc	Inverse areal material ratio (p = 10%)	ISO 25178	µm
Slope	Sdq	Root mean square gradient	ISO 25178	no unit
Volume	Sdv	Closed dale volume	ISO 25178	µm 3
	Shv	Closed hill volume	ISO 25178	µm 3
	Vm	Material volume at a given material ratio (p = 10%)	ISO 25178	µm 3/µm 2
	Vmc	Material volume of the core at given material ratio (p = 10%, q = 80%)	ISO 25178	µm 3/µm 2
	Vmp	Material volume of the peaks (p=10%)	ISO 25178	µm³/µm²
	Vv	Void volume at a given material ratio (p = 10%)	ISO 25178	µm 3/µm 2
	Vvc	Void volume of the core (p = 10%, q = 80%)	ISO 25178	µm 3/µm 2
	Vvv	Void volume of the valley at a given material ratio (p = 80%)	ISO 25178	µm 3/µm 2

## Sheet: Table S4
Table S4: Descriptive statistics (mean ±SD) for all DMT parameters for the tumbling experiment (see Table S2). For parameter descriptions, see Table S3.
	very fine sand (51–168 μm)										fine sand (112–292 μm)										medium sand (221–513 μm)										fine-grained gravel (2–8 mm)
	Equus sp.		Capreolus capreolus		Otomys sp.		Crocodylus niloticus		Charcharhinus plumbeus		Equus sp.		Capreolus capreolus		Otomys sp.		Crocodylus niloticus		Charcharhinus plumbeus		Equus sp.		Capreolus capreolus		Otomys sp.		Crocodylus niloticus		Charcharhinus plumbeus		Equus sp.		Capreolus capreolus		Otomys sp.		Crocodylus niloticus		Charcharhinus plumbeus		Hippotherium primigenium
	n=3	n=3	n=3	n=3	n=3	n=3	n=3	n=3	n=3	n=3	n=3	n=3	n=3	n=3	n=3	n=3	n=3	n=3	n=3	n=3	n=3	n=3	n=3	n=3	n=3	n=3	n=3	n=3	n=3	n=3	n=3	n=3	n=3	n=3	n=2	n=2	n=3	n=3	n=3	n=3	n=6
Parameter	before tumbling	after tumbling	before tumbling	after tumbling	before tumbling	after tumbling	before tumbling	after tumbling	before tumbling	after tumbling	before tumbling	after tumbling	before tumbling	after tumbling	before tumbling	after tumbling	before tumbling	after tumbling	before tumbling	after tumbling	before tumbling	after tumbling	before tumbling	after tumbling	before tumbling	after tumbling	before tumbling	after tumbling	before tumbling	after tumbling	before tumbling	after tumbling	before tumbling	after tumbling	before tumbling	after tumbling	before tumbling	after tumbling	before tumbling	after tumbling	potentially natural altered
Area
Sda	42.4441	37.7764	41.5215	75.2006	66.5473	27.3076	125.734	143.438	73.1431	29.5932	50.4084	112.911	59.3427	79.819	57.7334	41.6715	82.709	114.356	93.465	52.913	49.0469	86.6402	72.099	133.085	61.8181	49.9958	174.043	244.273	71.097	100.783	41.5213	19.7021	43.3802	12.5201	73.4978	8.23078	305.942	47.5121	91.7183	20.2202	47.1094
±SD	18.4528	10.7993	28.8641	51.9993	45.9016	8.895	38.436	61.2098	57.7436	11.4675	21.3477	50.0277	49.7896	79.9626	1.81084	7.56075	39.3531	46.9103	40.0295	27.0956	11.7587	18.0911	70.3594	95.2015	19.5466	22.4474	33.3091	72.9655	11.3636	33.5952	33.4966	9.88237	22.3569	2.5106	34.765	1.75074	39.1952	14.0276	11.7086	2.83707	30.0616
Sha	47.0907	40.3681	65.9127	59.797	71.0285	28.2186	315.036	203.539	113.089	31.0261	63.5562	137.645	62.811	73.0067	48.9473	40.1758	153.012	94.7756	110.878	70.0684	60.4255	122.765	111.065	269.681	58.6751	50.9468	275.289	373.145	98.8992	140.366	37.7636	21.131	71.0905	12.7525	64.9263	7.53962	292.739	87.3787	153.729	22.3096	44.6862
±SD	20.822	21.7596	54.3655	41.9311	63.6846	9.28238	148.44	46.2494	110.174	10.4455	24.5022	61.8119	38.3497	54.263	11.9385	6.4308	123.548	22.0335	36.2412	14.875	17.6438	17.3352	123.965	208.844	15.2135	27.8734	50.4419	260.214	22.496	62.5871	24.4968	11.2752	56.7515	3.11509	34.8033	1.01704	192.212	19.2084	31.4464	4.41286	16.8226
mea	327.23	233.144	1044.81	489.644	278.61	138.465	1171.81	496.476	1055.36	111.9	605.62	1019.19	1370.39	661.568	228.444	240.601	622.337	652.331	1144.59	381.358	472.675	667.926	805.152	2530.12	263.71	281.079	745.63	914.737	1082.94	717.807	251.388	113.483	1672.84	31.2247	307.504	14.1531	971.43	118.154	912.792	74.9561	476.181
±SD	174.32	231.005	1348.96	596.667	99.5705	83.9678	385.734	376.542	364.324	32.5451	376.129	595.617	1482.33	753.696	58.2156	95.4513	433.013	98.0456	308.046	48.1285	266.853	183.827	608.696	2285.41	94.5742	198.917	268.762	291.849	456.291	377.863	214.023	112.198	1414.61	14.613	186.692	0.0575112	510.091	40.9962	291.683	17.146	372.961
Complexity
Sdr	3.53161	4.66951	2.02743	4.57174	5.64853	3.33706	4.44232	5.31259	0.249866	1.7581	3.2371	2.78086	2.36425	2.48813	2.397	3.2026	5.40992	4.89213	0.276474	0.796071	3.18498	1.88987	2.64519	2.41772	2.98905	2.17987	3.35112	2.31375	0.387407	0.473602	4.31176	3.06513	1.09399	4.72213	2.15457	3.85466	2.96578	3.39496	0.39508	3.10371	3.07513
±SD	0.579503	1.59962	0.831891	1.62176	2.41432	1.567	1.72339	1.03437	0.0560613	0.774969	1.08783	1.02604	1.55031	1.32564	1.16676	1.72342	3.61044	1.3743	0.0682233	0.307109	0.123506	0.408393	3.35019	3.2796	0.792335	0.539289	1.57684	0.84058	0.195715	0.249776	1.26174	0.3616	0.556255	0.836226	0.499076	0.713119	0.752397	1.61696	0.0215381	0.746772	1.5046
nMotif	96.8333	190.5	350.5	268	16.8333	37	27	81.6667	27.6667	245.167	53.6667	40.6667	133	156.5	16.6667	17.5	90	41.5	24.8333	70.6667	72	43.1667	43.8333	21.8333	15.8333	20.6667	38.3333	30.8333	26.3333	43.3333	218.5	455	211.833	940.333	16.25	256.5	31.1667	246.333	31.5	360.167	79.25
±SD	41.4317	120.107	539.962	361.053	10.1036	17.7553	10.332	53.0126	9.56992	82.3352	28.2592	31.394	198.481	202.689	4.72582	8.67468	103.068	5.89491	8.83648	11.5794	40.1591	14.5802	24.0642	22.1152	6.21155	17.8629	13.2508	10.681	9.1697	19.0941	205.563	155.974	334.118	377.561	10.9602	0.707107	12.5731	100.35	11.9059	82.282	35.2261
Asfc	6.20341	8.50097	4.15158	9.0134	7.35774	4.88189	6.26381	8.48306	0.3543	3.36492	5.64131	4.3588	4.81298	4.69994	3.30086	4.66677	7.73754	7.16873	0.390848	1.49138	5.5387	3.01868	3.6474	3.13212	3.78711	3.09374	4.88547	3.43648	0.543287	0.758531	7.90122	6.1627	2.40175	10.6301	2.46898	7.32163	4.42724	6.3708	0.514906	6.28345	5.64173
±SD	1.26514	3.1439	2.01571	2.80099	4.84831	2.53123	1.98786	0.72071	0.13121	1.46493	1.86615	1.41042	3.38504	2.24016	1.71036	2.68709	5.43734	1.34336	0.116447	0.658397	0.314124	0.528743	3.8152	3.83201	1.43353	0.423501	1.73138	1.25136	0.214729	0.416491	1.68642	0.649226	1.35093	2.1308	0.103904	0.904049	1.44763	2.69051	0.0740902	1.7029	2.63914
Density
Sal	16.2226	15.0218	15.031	12.8619	7.69498	6.752	13.0669	13.4194	19.0897	17.1921	18.3482	18.119	15.8136	16.9932	7.45897	7.39706	12.1977	12.4413	18.9446	17.7666	17.2039	17.3346	18.0775	17.864	7.1608	7.41291	12.7932	13.35	19.2464	17.7102	12.8056	10.0647	20.5794	10.0461	7.16948	3.54468	11.9814	7.6347	18.0352	7.01989	18.5214
±SD	4.69888	4.49169	8.1014	5.5277	0.644651	0.611136	0.366418	1.17991	1.54616	1.51104	2.20888	3.29971	3.06195	2.35052	0.257479	0.789199	0.947739	0.436252	1.47201	1.35604	1.61324	1.96065	0.998301	2.33519	0.283745	0.478755	1.23247	1.20031	2.03429	1.64907	2.51358	3.90966	3.16115	4.90247	0.927689	0.120562	0.823213	0.440907	1.32125	0.905945	1.98595
Spd	0.0209279	0.0247786	0.0286324	0.0276953	0.0156481	0.0298004	0.00101563	0.00297526	0.00969417	0.0293099	0.0139802	0.00630859	0.0196754	0.0188477	0.0138889	0.0134911	0.00378906	0.00162109	0.00654324	0.0102799	0.0147435	0.00598958	0.0140128	0.0048112	0.0109234	0.0146461	0.00140625	0.000976563	0.00703904	0.00462891	0.0325335	0.0541391	0.0213324	0.0762565	0.0104861	0.122736	0.00104167	0.00920573	0.00463181	0.0413411	0.0205241
±SD	0.00821899	0.0115095	0.032819	0.0300492	0.0141574	0.00956387	0.000333178	0.00197269	0.00649729	0.00933768	0.00559732	0.00414776	0.0200881	0.0182595	0.00559534	0.00250005	0.0045876	0.000206699	0.00404445	0.00396799	0.00517861	0.000867402	0.0096286	0.00666392	0.00472829	0.0127007	0.000570433	0.0003125	0.000927371	0.00237311	0.0225414	0.0147472	0.0244487	0.016859	0.00893704	0.0108791	0.000582782	0.00291051	0.00118309	0.0110226	0.00560351
medf	4554.92	4312.56	4834.81	4506.35	4858.52	4755.23	4237.88	4479.47	4855.07	4727.6	4575.91	3823.84	4706.18	4484.35	4480.22	4504.64	4348.23	4196.39	4719.76	4307.51	4379.93	3912.63	4733.28	4131.16	4352.88	4361.85	4367.82	3651.85	4501.53	3518.51	4654.83	5009.88	4920.78	5062.35	4478	5182.92	4152.13	5195.86	4251.42	4733.17	4873.84
±SD	155.475	39.0027	384.224	560.077	72.6342	110.955	153.078	149.908	245.206	72.5469	88.8564	173.013	257.797	314.876	206.392	157.46	148.725	173.838	99.2727	406.351	58.2806	172.382	464.131	733.113	151.503	99.9037	402.379	494.811	318.685	139.577	351.788	172.693	2.8538	86.5358	166.5	108.539	261.386	51.8595	116.925	164.948	168.782
Direction
Std	82.5022	59.2479	114.38	112.583	102.418	61.337	91.7472	70.1683	82.1211	106.13	84.0826	64.3353	107.494	106.375	91.7519	84.0434	97.9167	84.4169	72.9978	83.6248	90.2466	81.293	111.334	112.499	68.7928	53.6679	87.7473	86.6694	81.8346	77.4171	69.5403	83.998	109.247	78.4582	133.128	51.6255	70.9129	77.1256	88.6678	83.7476	118.728
±SD	19.4209	35.8563	19.3721	58.6675	35.264	48.1332	4.77134	16.9838	16.539	11.9821	41.6017	22.9175	15.0319	23.6305	77.0848	76.5739	9.22712	4.05465	10.4797	21.8631	51.7457	44.2551	26.9364	21.9583	73.5557	28.3539	6.47802	3.90789	11.2041	12.7661	55.8849	66.7859	36.7878	12.0871	60.9938	24.2218	11.3827	20.36	3.6542	16.1997	55.0797
Str	0.435135	0.591939	0.279664	0.367121	0.606375	0.473018	0.240022	0.390601	0.385059	0.440863	0.388205	0.509847	0.42549	0.49416	0.386374	0.481804	0.322127	0.318444	0.489002	0.480218	0.433917	0.421897	0.369934	0.407503	0.50031	0.565168	0.210519	0.256513	0.550828	0.571722	0.622517	0.599035	0.386771	0.641198	0.313691	0.718415	0.285514	0.526933	0.526166	0.624256	0.613051
±SD	0.219974	0.211614	0.0957085	0.147615	0.0562628	0.0997173	0.136483	0.22248	0.0403535	0.0817017	0.252049	0.201288	0.177701	0.1355	0.21502	0.046218	0.262813	0.0962523	0.107626	0.118946	0.130384	0.195481	0.160635	0.212436	0.081672	0.171744	0.0733009	0.075651	0.113714	0.159801	0.0686283	0.155333	0.0695726	0.064538	0.167345	0.14412	0.0575561	0.163612	0.123218	0.0627309	0.068925
Tr1R	56.9585	64.4309	118.961	92.4115	55.6137	49.4104	93.0808	74.9993	78.0787	97.4916	104.989	82.4973	107.059	104.96	37.5712	30.1033	75.0061	90.0006	81.1675	82.2481	86.9679	86.9103	99.2123	101.915	25.7334	45.072	88.6066	84.3777	90.0035	81.1912	63.0833	60.0362	98.7109	75.0086	0.155001	45.037	83.8342	90.0124	90.0046	82.4851	90.0339
±SD	29.0128	27.2858	25.1299	32.1777	33.7293	7.64223	5.34677	25.988	20.628	12.9825	25.9864	25.9811	16.3965	25.9093	46.7649	51.875	25.9822	0.020731	15.2782	26.6234	75.3108	40.4569	32.187	20.62	44.2719	44.929	2.39296	9.75216	0.00260228	15.2587	23.7686	34.3027	25.4752	25.969	0.0484781	0.053481	10.6648	0.0433753	0.00384917	12.9916	49.2686
Tr2R	61.9978	58.4492	112.255	90.0007	73.6763	66.1752	63.6765	65.0961	62.9193	90.8417	79.4468	85.5928	100.764	108.485	13.3328	61.9888	78.004	82.7772	69.1451	83.0276	94.4106	63.4507	102.101	74.8918	34.435	34.4411	72.2789	70.2926	68.9984	67.9423	93.0889	78.0759	104.704	53.819	70.3129	45.041	59.9273	74.046	65.9904	48.097	81.6368
±SD	19.1651	24.2233	20.4572	44.9852	18.0665	29.0211	37.9864	18.9819	17.6241	40.0199	41.6614	29.3693	22.194	10.602	13.1488	37.6387	9.43732	13.1154	11.8225	18.2765	43.3026	49.5944	12.6136	18.5002	18.2962	18.2816	11.89	12.1774	28.244	2.66102	40.4548	49.5124	33.2714	15.2722	35.7937	0.039116	19.1458	25.9824	13.1479	5.34536	30.9656
Tr3R	100.582	55.0343	102.265	97.6167	60.6681	34.483	83.8268	58.8821	69.2579	89.4947	87.0935	97.3923	110.527	93.6655	58.2404	32.6539	50.7278	68.2568	61.5854	70.3334	82.749	63.898	97.3322	96.9381	70.0405	43.174	69.3412	58.6713	70.7646	82.1667	45.3408	94.4005	104.321	51.2133	74.1182	72.1239	71.5269	49.9525	64.8258	87.5355	100.491
±SD	18.3458	42.0383	18.1739	29.2941	27.3972	38.9009	19.3659	25.0245	6.77524	29.2393	46.329	45.1057	16.3992	50.5531	47.2144	10.6983	21.497	5.17164	5.28941	27.6919	43.8294	25.3505	43.1728	19.8813	52.0941	42.9054	24.1063	13.114	12.5617	7.49913	16.7204	7.65161	34.2697	18.0119	67.3702	25.2808	9.66662	34.66	21.5343	15.8036	43.2763
IsT	60.5191	59.7682	35.4559	53.4444	61.7038	52.2938	28.9446	58.8037	36.9451	18.6723	56.3936	54.7748	29.7487	34.4591	52.2178	49.057	32.2565	24.6473	31.5363	20.8096	40.0816	37.8775	51.2102	52.2081	39.6957	44.088	16.8089	23.3519	32.8441	25.6374	66.0184	61.5751	34.7292	53.6142	32.5571	63.95	20.6095	46.8292	36.0275	59.8731	73.7156
±SD	29.9572	34.5226	5.35489	17.7787	10.7845	7.6272	17.5667	40.7897	3.98087	9.40169	35.2901	33.2285	10.5281	16.3253	7.81529	12.1774	28.3528	10.9302	1.04274	14.1458	29.7837	22.854	13.3255	20.7938	4.30451	13.7949	1.84533	9.87428	7.33512	10.9546	6.48256	5.95214	30.8208	12.014	14.1836	6.75243	5.50149	21.7967	11.065	7.65281	8.11048
epLsar	0.0171385	0.0176839	0.017232	0.0177677	0.0178946	0.017941	0.0156751	0.0165846	0.0159173	0.0160852	0.0169143	0.017269	0.0166439	0.0171748	0.0189058	0.0187519	0.0164879	0.015508	0.016399	0.0159122	0.0172542	0.0171494	0.0169146	0.0169338	0.0189044	0.0181973	0.0161165	0.0157552	0.0158779	0.0151564	0.0177929	0.0176275	0.0171371	0.0170004	0.0194542	0.0177913	0.0155815	0.0166284	0.0156285	0.0167559	0.0178761
±SD	0.000782013	0.000649337	0.00145394	0.00102968	0.000405641	0.000788992	0.000874425	0.00152557	0.000360024	0.000519859	0.00136508	0.0013911	0.000999515	0.00143729	0.00123562	0.00121181	0.00116914	0.000704101	0.000301988	0.00171586	0.000677181	0.0010608	0.00061948	0.000603367	0.000547294	0.000822636	4.07069e-05	0.000484684	0.00110812	0.000727603	0.000115945	0.000434798	0.0019016	0.000218858	0.00076373	0.000169235	0.00050712	0.00120793	0.000531995	0.000469545	0.000711616
Height
S10z	2.2816	2.21046	1.72749	3.47517	3.39765	1.53012	5.8424	5.65179	0.756966	1.24487	2.22944	2.7709	2.41345	1.9393	1.38214	1.74528	4.82713	6.25579	0.838235	0.893762	2.59443	2.14643	2.40844	5.21018	2.29006	1.48389	4.34773	3.47625	0.967027	0.94861	2.45283	1.53192	1.24394	1.46817	1.6785	0.949932	4.20938	2.12885	0.827948	1.76273	2.16564
±SD	0.19647	0.196581	0.568823	1.97387	1.62432	0.251009	1.49689	1.86013	0.183303	0.391627	0.851898	0.65354	1.53216	1.02936	0.234044	0.581515	2.76107	0.620834	0.0794732	0.259858	0.644922	0.421268	2.56611	6.43082	0.409399	0.556212	1.97251	0.903061	0.339044	0.166772	1.44616	0.0409297	0.427665	0.265699	0.659479	0.180339	0.784467	0.964067	0.0222521	0.327944	1.03822
S5p	0.415115	0.791414	0.512983	1.94515	1.3744	0.529438	2.59246	2.71784	0.324345	0.465061	0.898141	1.10052	0.989444	0.359215	0.612678	0.688771	2.14576	2.60178	0.336454	0.393029	0.806526	0.560227	0.495453	0.922102	0.973122	0.636989	1.75335	1.42437	0.425967	0.424381	0.535761	0.506809	0.349908	0.540368	0.507446	0.468128	2.48566	0.684644	0.374171	0.788083	0.896667
±SD	0.176575	0.14529	0.228593	1.35193	0.904001	0.307329	0.532223	0.64103	0.156096	0.177841	0.30025	0.513441	0.644458	0.139243	0.107028	0.343856	1.68972	1.01293	0.152594	0.154234	0.429331	0.250605	0.326561	0.888891	0.0981831	0.0940383	0.58573	0.196944	0.230555	0.0372893	0.0681791	0.290615	0.156096	0.0504744	0.199579	0.0669593	0.70425	0.656799	0.052305	0.31102	0.647506
S5v	1.86631	1.46706	1.16985	1.53003	1.796	0.854016	3.06603	2.27448	0.398593	0.715798	1.52332	1.58876	1.32943	1.87592	0.824273	1.02507	2.58301	3.07349	0.524297	0.460502	1.7478	1.6559	2.07907	2.67337	1.32124	1.19529	2.4015	2.11955	0.504099	0.512679	1.79723	0.99124	0.757402	0.90656	1.1211	0.493388	1.96941	1.4377	0.42787	0.993246	1.26679
±SD	0.256332	0.191199	0.369932	0.684443	0.505847	0.149426	1.25049	0.262869	0.0664122	0.191872	0.460637	0.243625	0.789403	1.30141	0.0859489	0.178882	2.00876	0.816483	0.0421347	0.0794994	0.0976866	0.292025	2.48916	3.05877	0.336953	0.657375	0.864265	0.57035	0.120842	0.0823134	1.25539	0.268737	0.213198	0.205387	0.383176	0.096998	0.36549	0.409401	0.0410096	0.117986	0.330175
Sa	0.490066	0.566103	0.330079	0.465534	0.504441	0.431641	0.803095	0.610554	0.241489	0.255968	0.599947	0.60864	0.426622	0.538897	0.408944	0.435161	0.582307	0.608064	0.220793	0.234785	0.55002	0.545147	0.437727	0.494583	0.423019	0.394229	0.578958	0.544076	0.268905	0.260894	0.425728	0.21157	0.322423	0.19301	0.427265	0.151382	0.580496	0.155686	0.262426	0.19341	0.442516
±SD	0.187516	0.177897	0.179636	0.269417	0.0783302	0.0657387	0.349057	0.330234	0.0106559	0.0452435	0.166938	0.119552	0.315709	0.433652	0.100943	0.120196	0.194367	0.178149	0.0322741	0.0473558	0.127217	0.132578	0.462597	0.432148	0.0494019	0.139991	0.155286	0.125157	0.0666522	0.0514274	0.275063	0.0886711	0.194707	0.025574	0.197399	0.000511353	0.00826047	0.0455102	0.0316519	0.0142972	0.136737
Sku	4.26936	3.51947	4.99963	5.18612	7.61738	3.45304	3.99033	3.92334	2.89962	3.42235	4.02177	3.86717	7.92451	6.20319	3.31014	3.48668	5.39325	5.32498	2.91573	2.87738	3.52891	3.82741	5.28423	6.18475	4.06698	3.8116	3.79898	3.98374	2.68825	2.70569	6.76741	6.76246	3.42998	3.9438	3.3165	3.45296	4.47467	10.721	3.00423	4.49584	4.21534
±SD	1.28035	0.579649	0.953819	0.769963	4.63004	0.275325	0.52289	0.14728	0.128214	0.366846	1.51928	0.151051	5.76949	3.69047	0.324024	0.536974	2.45843	1.85112	0.183857	0.219033	0.793945	1.1649	0.723696	0.996957	0.767344	1.14921	0.704148	0.620209	0.248283	0.193226	1.87709	3.64537	0.175087	0.911852	0.208223	0.480306	1.58044	1.63524	0.224631	0.91479	0.638164
Sp	1.63906	2.23078	1.43834	4.67009	4.74897	1.67	5.23456	4.84376	0.873911	1.05745	2.32833	2.70395	2.28961	2.01335	1.62859	1.50929	4.53425	5.42648	0.938553	0.912365	2.77063	2.16058	2.09654	2.57404	1.86475	1.58001	4.16801	3.25336	1.02757	0.995782	1.83457	1.39825	1.25848	0.985243	1.79946	0.640497	4.65177	1.23282	1.00104	1.32263	2.84532
±SD	0.537338	0.824056	0.783688	4.00993	1.4418	0.646331	1.27505	1.66069	0.0593798	0.0468177	0.829494	1.46156	1.46155	1.67896	0.682041	0.668953	3.45283	1.96201	0.154672	0.249638	1.06523	0.540293	1.58711	2.12288	0.612385	0.675458	2.10142	1.20139	0.207724	0.167748	1.21278	0.709123	0.719767	0.245671	0.757728	0.121039	1.02221	0.600962	0.0970293	0.3078	2.39308
Sq	0.636644	0.725101	0.427965	0.651106	0.6658	0.542463	1.00279	0.763328	0.298868	0.32128	0.772009	0.794347	0.585747	0.717951	0.520668	0.543913	0.7576	0.813702	0.275535	0.290784	0.690628	0.689584	0.59493	0.676711	0.555175	0.510732	0.744701	0.697691	0.332949	0.323334	0.577454	0.283541	0.41575	0.247671	0.54055	0.193503	0.733345	0.226713	0.329729	0.251884	0.571982
±SD	0.20238	0.208785	0.232175	0.393924	0.0805184	0.0720698	0.441121	0.401688	0.0147908	0.0522853	0.196591	0.15134	0.439945	0.581548	0.119929	0.141474	0.26473	0.270731	0.0432289	0.0613364	0.139521	0.13912	0.63805	0.592177	0.0745892	0.186966	0.179739	0.140223	0.0801933	0.0648366	0.3572	0.1159	0.259539	0.0377413	0.246314	0.00326008	0.00818031	0.0681049	0.0398313	0.0169079	0.181788
Ssk	-0.718757	-0.455179	-0.696045	-0.164686	-0.250334	-0.24394	-0.131117	-0.187457	0.0980297	-0.209208	-0.481138	-0.403586	-0.847811	-0.983304	-0.341183	-0.495932	-0.0652342	0.213129	0.0565263	-0.168892	-0.42728	-0.374752	-0.35642	-0.566878	-0.430238	-0.324007	0.112762	-0.0326404	0.132495	0.0742439	-1.30175	-1.01261	-0.300626	-0.486287	-0.319681	-0.464793	0.0451532	-1.75513	-0.0695807	-0.563148	-0.670216
±SD	0.711818	0.422655	0.217493	1.1629	0.444408	0.294894	0.197064	0.267194	0.0252072	0.278783	0.55571	0.344508	0.755334	0.94934	0.334946	0.183997	0.715661	0.785776	0.035718	0.181736	0.357469	0.578288	0.576957	0.580213	0.405801	0.487447	0.174003	0.085277	0.183548	0.0544515	0.400988	0.790953	0.168211	0.144606	0.393537	0.00850546	0.0423623	0.421056	0.0602542	0.203549	0.181602
Sv	3.01623	2.80525	2.2425	3.83144	3.14592	1.74584	6.75635	4.05193	0.977926	1.37925	3.37809	3.41986	3.20597	3.457	1.98592	2.63767	5.40056	4.83594	1.07536	1.19526	2.73522	2.90491	3.34056	5.28495	2.45017	2.51076	4.0663	3.65083	1.08005	1.08908	3.27181	1.98209	2.02481	1.5328	2.23931	0.766792	3.60129	1.94917	1.22469	1.51007	2.6658
±SD	0.194616	0.274295	0.809365	3.0063	1.24807	0.234969	2.48894	1.62058	0.156765	0.454086	1.103	0.854239	2.21769	2.28337	0.543038	1.36266	3.49809	1.07144	0.149845	0.237452	0.24984	0.625224	3.48096	5.99037	0.591506	1.52895	1.21178	0.982027	0.249475	0.265548	1.38683	0.597677	1.10964	0.440788	0.903399	0.0893372	0.903455	0.562512	0.165279	0.160422	0.687027
Sxp	1.55874	1.63379	1.00418	1.30395	1.3232	1.09782	1.81972	1.45663	0.547426	0.663649	1.71118	1.90845	1.40131	1.55053	1.17873	1.21391	1.56923	1.58183	0.547775	0.6028	1.47759	1.44462	1.51002	1.6148	1.34373	1.19691	1.36098	1.37851	0.607296	0.5661	1.57051	0.670268	0.918099	0.558718	1.16078	0.454696	1.46814	0.57391	0.65975	0.580786	1.28808
±SD	0.248512	0.285642	0.547888	0.883525	0.292339	0.156532	0.697804	0.57335	0.0503132	0.178591	0.353979	0.378721	1.01473	1.1503	0.204488	0.157782	0.639389	0.492249	0.0809616	0.136086	0.201705	0.115118	1.79877	1.6051	0.354592	0.554823	0.268657	0.286701	0.129052	0.121367	0.944018	0.256491	0.625377	0.0898142	0.40387	0.0166689	0.0396119	0.184903	0.0867378	0.0419758	0.400046
Sz	4.66412	5.08671	3.75713	7.45803	8.6501	3.49253	12.315	9.4909	1.89632	2.50493	5.4577	6.58011	5.85053	5.60063	3.62749	3.99531	11.4649	10.3273	2.09039	2.17647	5.28584	5.01374	5.95534	8.74569	4.20848	4.02489	8.08686	6.85813	2.14044	2.11095	5.09942	3.26558	3.39945	2.72159	4.07624	1.40729	8.81558	3.35835	2.35868	2.91815	5.7821
±SD	0.711288	1.02313	1.53181	5.36097	2.54915	0.47439	3.29996	4.06661	0.21387	0.361027	1.46958	2.47642	3.93628	4.01874	1.19567	1.77083	7.2575	2.57563	0.0886281	0.544477	1.18708	0.219354	6.14636	8.78869	0.0112911	2.0487	2.30406	1.65593	0.392312	0.452767	2.60064	0.798871	1.99591	1.04818	1.77604	0.210376	1.92748	1.30018	0.0639333	0.529768	2.85
meh	0.342433	0.404015	0.425939	1.10862	1.23933	0.343459	1.11065	0.869577	0.187613	0.198013	0.471685	0.705334	0.702856	0.481839	0.370113	0.416045	1.11488	1.14832	0.218212	0.189783	0.413649	0.440191	0.521048	1.22016	0.463437	0.498299	0.96852	0.757636	0.227085	0.218473	0.392765	0.236015	0.352392	0.214236	0.530553	0.152763	1.0025	0.255515	0.24404	0.239512	0.490409
±SD	0.0773625	0.105674	0.303893	1.19312	0.104876	0.0619843	0.303761	0.441251	0.048391	0.0259219	0.185639	0.293816	0.532953	0.395063	0.0628732	0.22014	0.85923	0.290611	0.0336335	0.0540145	0.100123	0.0631467	0.583592	0.985346	0.0519814	0.327954	0.421168	0.286979	0.0428376	0.00178515	0.220488	0.0621974	0.224085	0.0547232	0.327273	0.00296308	0.248655	0.116925	0.0418472	0.0385076	0.323723
madf	2.48	2.66528	1.26194	3.59892	2.26101	0.969153	5.48239	2.47739	0.614206	1.10935	2.64705	2.73324	2.62618	2.5562	1.08816	1.188	3.8121	3.77176	0.735598	1.18949	2.31333	2.38494	1.21638	1.76535	1.41498	1.34024	3.20281	2.93381	0.696345	0.940368	2.35875	2.04811	1.00411	1.33224	1.14473	0.852113	3.0151	2.04768	0.853552	1.72695	2.31556
±SD	0.196643	0.228953	1.04266	1.30993	1.10652	0.163762	1.94669	0.23173	0.134131	0.333717	0.78653	0.331617	1.39526	1.42161	0.196905	0.227133	3.37929	0.73743	0.0237425	0.230135	0.0822546	0.658856	2.8011	5.05998	0.0899307	0.385072	0.982566	0.813381	0.258039	0.161374	0.799887	0.415488	0.217933	0.353184	0.201452	0.0514023	1.07016	0.424684	0.0433454	0.210173	0.672611
metf	0.481545	0.615625	0.262898	0.558225	0.36004	0.308623	0.772164	0.665482	0.175955	0.294677	0.47701	0.576186	0.364109	0.389838	0.29381	0.334208	0.759047	0.676148	0.190469	0.249956	0.507492	0.479302	0.39082	0.464966	0.356697	0.306891	0.627536	0.599888	0.243624	0.255714	0.513462	0.297707	0.186785	0.323121	0.299419	0.265707	0.69419	0.243133	0.272292	0.335593	0.386387
±SD	0.0700962	0.0946289	0.0866811	0.308865	0.0701505	0.062939	0.282309	0.256696	0.0272865	0.0706302	0.0421175	0.0990528	0.195562	0.197997	0.0708097	0.065648	0.214723	0.171102	0.0185484	0.043093	0.0303462	0.0598589	0.448713	0.528169	0.0155342	0.0416939	0.158282	0.109059	0.106747	0.0808316	0.283064	0.0590539	0.0435433	0.0343606	0.0659515	0.0035209	0.052647	0.0624489	0.00873177	0.0276777	0.12717
FLTt	2.7781	3.05864	1.53575	3.34277	1.55056	1.33305	6.02572	4.77362	1.24606	1.3426	3.80979	3.84214	2.96589	3.1657	1.24419	1.41012	5.58907	5.1017	1.20585	1.22137	2.94265	2.93027	3.13945	3.4654	1.51406	1.39797	5.17819	3.83383	1.43018	1.33147	2.64504	1.21787	1.7114	0.794543	1.40055	0.282947	4.40949	1.24185	1.44665	0.818911	2.55637
±SD	0.830665	0.946374	0.949713	2.58679	0.554424	0.315109	1.55769	1.97824	0.0598218	0.228856	0.832019	0.500333	2.59991	2.7975	0.330972	0.369234	3.06834	1.9259	0.212457	0.293891	0.346278	0.571649	3.79522	3.24094	0.481131	0.714335	1.93069	0.879449	0.377868	0.304342	1.5739	0.851015	1.26369	0.330772	0.779519	0.029081	1.08454	0.621345	0.251111	0.133356	0.91661
FLTp	1.06819	1.29362	0.711546	1.36662	0.782706	0.673512	3.12838	2.43075	0.628657	0.619112	1.51492	1.53446	1.07056	1.18548	0.612321	0.722406	2.59967	2.40633	0.579541	0.595473	1.28853	1.26103	1.16955	1.2403	0.602298	0.598204	2.58678	1.7592	0.741073	0.666573	0.8886	0.372319	0.782285	0.329925	0.753184	0.127411	2.2033	0.425646	0.735658	0.358559	1.00814
±SD	0.504108	0.592359	0.465376	0.973014	0.157629	0.217215	0.895895	1.12815	0.0564753	0.0331226	0.364673	0.0912557	0.998317	1.02401	0.160014	0.273749	1.34925	0.792915	0.0853414	0.151307	0.34161	0.408415	1.22359	1.07306	0.0299859	0.337649	0.763311	0.551934	0.237609	0.192283	0.752451	0.224627	0.518027	0.0840235	0.520276	0.00997759	0.3045	0.205965	0.221554	0.0488243	0.377987
FLTv	1.64362	1.71479	0.849892	1.70291	0.731571	0.630135	2.89574	2.37164	0.6079	0.697654	2.28773	2.39793	1.89292	1.76707	0.674946	0.761651	2.98032	2.71138	0.621142	0.652416	1.7102	1.70759	1.98328	2.23093	0.863729	0.805673	2.55813	2.04274	0.658992	0.61105	1.75644	0.774578	0.921876	0.467539	0.705735	0.153628	2.34779	0.734419	0.743324	0.467009	1.58041
±SD	0.385189	0.374722	0.495452	1.66182	0.316835	0.150531	0.715395	0.877195	0.0477058	0.261433	0.677689	0.638369	1.62505	1.41999	0.180336	0.162764	1.73397	1.15242	0.102752	0.130281	0.0776164	0.291851	2.5598	2.1577	0.437995	0.469423	1.15129	0.415727	0.1617	0.155621	0.831423	0.564902	0.752336	0.237423	0.32132	0.0218013	0.852459	0.296264	0.0835381	0.162793	0.610961
FLTq	0.495994	0.559252	0.31366	0.408577	0.341766	0.321556	1.31282	0.999712	0.262539	0.236216	0.641449	0.665692	0.42946	0.534748	0.306451	0.37859	1.12098	1.14158	0.235195	0.229676	0.570249	0.578693	0.483019	0.530779	0.366427	0.338179	1.18749	0.74451	0.283757	0.271641	0.404929	0.178301	0.311263	0.130519	0.386112	0.060334	0.816421	0.226121	0.275098	0.137018	0.443993
±SD	0.250533	0.216429	0.207405	0.269722	0.124297	0.0861623	0.372087	0.410524	0.0114986	0.0391873	0.169919	0.14467	0.33195	0.445682	0.109443	0.121656	0.652592	0.460193	0.0524973	0.0460494	0.133726	0.160033	0.567769	0.525613	0.0676505	0.14253	0.535481	0.192829	0.063223	0.0519483	0.280838	0.103237	0.196742	0.035001	0.227352	0.0014104	0.214533	0.140101	0.0434621	0.0188256	0.13649
Peak sharpness
Spc	0.7014	0.786473	0.585029	1.31582	1.93397	0.924216	7.36297	8.99739	0.268372	0.590272	0.747929	0.68838	0.548726	0.591393	0.642425	0.703304	8.52645	15.4964	0.262526	0.390289	0.634416	0.548186	0.776423	1.52352	0.806162	0.522514	8.21659	5.36341	0.24898	0.484531	0.826751	0.685038	0.413303	0.811436	0.693627	0.879317	6.19094	1.99009	0.250862	0.635	0.743804
±SD	0.0437117	0.0996872	0.0887019	0.995113	0.645937	0.419203	0.120121	5.18253	0.0279954	0.0755548	0.180651	0.359871	0.180353	0.221779	0.216058	0.432547	8.60133	2.32826	0.02554	0.121743	0.0463718	0.0307034	0.748374	2.08378	0.191115	0.116416	5.45993	1.63541	0.0115868	0.0412848	0.166787	0.0239233	0.108866	0.086045	0.00410766	0.16566	2.44784	1.56301	0.0142394	0.164323	0.204109
Plateau size
Smc	0.737538	0.893722	0.523829	0.732933	0.765533	0.689303	1.30169	0.957699	0.399408	0.412741	0.963621	0.946504	0.697633	0.848323	0.62929	0.661895	0.919621	0.928664	0.347279	0.36507	0.874703	0.855454	0.68255	0.773049	0.654673	0.610074	0.909612	0.849023	0.426741	0.434887	0.606254	0.318838	0.497314	0.295707	0.693197	0.228757	0.957562	0.222014	0.425992	0.295794	0.656337
±SD	0.326656	0.313346	0.288549	0.455348	0.11452	0.138119	0.602716	0.535115	0.0379862	0.0425135	0.325417	0.218527	0.583531	0.721913	0.165191	0.222739	0.316521	0.230397	0.0508879	0.0769613	0.209719	0.282227	0.72301	0.665913	0.0425305	0.238572	0.2406	0.164227	0.116789	0.100062	0.416443	0.141518	0.276183	0.0357088	0.404137	0.00305136	0.0334077	0.0592342	0.0579844	0.0251146	0.204361
Smr	21.4803	5.91113	40.6397	28.6746	0.145741	28.7905	0.172073	0.0083434	64.9315	43.2171	6.77397	6.88916	33.6651	42.4206	24.5149	32.2841	3.41036	0.0384787	61.2909	64.0883	6.11461	10.5345	33.6379	32.5536	13.9596	23.9842	2.02937	1.8094	50.6955	51.7737	34.9388	31.5394	49.6864	60.205	13.8448	93.2777	0.167821	44.396	49.9333	20.3808	11.3061
±SD	15.5367	4.36662	49.2256	49.6208	0.0498162	24.1908	0.275394	0.00542377	7.16272	8.66972	5.51356	5.85099	55.5218	48.7607	21.7112	27.2002	5.5445	0.0206787	18.4014	28.8471	9.64952	9.85554	55.0995	56.1095	14.7749	19.8074	2.48364	2.30936	22.5279	19.9015	42.7911	54.4831	45.0229	29.6336	15.6847	6.65777	0.202815	43.2701	12.1756	29.8439	15.4336
Slope
Sdq	0.279072	0.315564	0.208067	0.342887	0.438055	0.259675	0.354321	0.419744	0.0707111	0.188315	0.263225	0.241153	0.2253	0.226146	0.223416	0.258777	0.403951	0.419401	0.0743377	0.126479	0.260197	0.2019	0.218349	0.23665	0.257946	0.217495	0.303455	0.242693	0.0865177	0.0956164	0.310632	0.254687	0.146407	0.315771	0.217431	0.283339	0.275024	0.27242	0.0891261	0.257185	0.25762
±SD	0.0265869	0.0588462	0.0508271	0.0942598	0.181033	0.0644084	0.0879497	0.122128	0.00777971	0.0416148	0.0498555	0.050612	0.09602	0.0738574	0.0487174	0.0781514	0.192309	0.0434159	0.00912047	0.0259704	0.00593663	0.0271868	0.183259	0.236201	0.0428836	0.0353185	0.0790834	0.0577344	0.0216741	0.0286055	0.0590032	0.0163711	0.0413829	0.0304142	0.0341942	0.0270259	0.0587314	0.0766484	0.00239704	0.0343978	0.0793092
Volume
Sdv	0.565837	0.633232	0.382987	1.61669	1.27832	0.304886	4.72772	5.30402	0.221094	0.285359	0.646191	1.50975	0.860396	1.191	0.475131	0.4604	5.15278	2.90077	0.250315	0.287198	0.684705	1.13036	1.04744	3.13665	0.688781	0.633657	3.16175	4.08332	0.267395	0.393754	0.77225	0.278615	0.297885	0.230906	0.62108	0.0919256	11.6359	0.904697	0.422871	0.31346	0.702424
±SD	0.16999	0.111382	0.226233	1.21821	0.990195	0.067205	0.0336381	2.91731	0.191137	0.100273	0.299853	0.862204	0.652646	1.10476	0.193625	0.221446	4.14478	0.518193	0.0840757	0.213839	0.162589	0.491757	1.4568	4.0125	0.280419	0.593236	1.34957	0.666216	0.159479	0.109808	0.678415	0.109023	0.228246	0.0829505	0.425734	0.0138233	4.1694	0.29097	0.0628062	0.0435169	0.559746
Shv	0.532324	0.571896	0.456704	1.56377	0.987654	0.237356	17.5338	8.12829	0.491042	0.215188	0.648462	1.81243	0.832987	0.872767	0.370799	0.326427	8.60733	6.24541	0.306359	0.397157	0.735507	1.27045	1.81267	7.96328	0.655748	0.364384	7.21282	19.719	0.38375	0.695765	0.633703	0.279642	0.43768	0.213865	0.403697	0.0935883	9.73982	1.67333	0.669113	0.302084	0.587523
±SD	0.240416	0.228731	0.234574	1.42609	0.504841	0.033377	15.5671	2.58475	0.645015	0.0359319	0.275757	1.0217	0.631671	0.641516	0.194223	0.0536095	11.596	1.99886	0.114381	0.233126	0.274364	0.205257	2.72026	11.406	0.229133	0.17199	4.0256	20.6151	0.317258	0.354275	0.579275	0.155695	0.276633	0.0964198	0.278776	0.0153907	7.3589	0.62745	0.421753	0.0541296	0.474507
Vm	0.0197542	0.027794	0.0143856	0.0393916	0.0293521	0.0210976	0.0441907	0.0305566	0.0122313	0.01374	0.0263401	0.0324464	0.0223441	0.0237624	0.0182199	0.0181015	0.0363521	0.0427017	0.0127664	0.0118584	0.027856	0.0271484	0.0242515	0.0293378	0.0207674	0.0189399	0.0376409	0.0337813	0.0140438	0.0133112	0.0216377	0.00928715	0.0147981	0.00940262	0.0240075	0.00785063	0.0351551	0.00773497	0.0151522	0.0105014	0.021841
±SD	0.00987585	0.0161702	0.00809941	0.0296166	0.00152508	0.00576142	0.0210705	0.0184987	0.00275932	0.000236067	0.00872187	0.0113422	0.0197076	0.0203835	0.00663379	0.00949221	0.0142656	0.0291572	0.00270334	0.00269924	0.0118593	0.00767385	0.0211983	0.0268133	0.00258352	0.00671571	0.00883029	0.0078674	0.00384617	0.00297262	0.0154912	0.00450144	0.0079661	0.00121674	0.0126177	0.00105604	0.0041176	0.00280634	0.00266966	0.00132472	0.00748595
Vmp	0.755297	0.918739	0.53821	0.770121	0.804538	0.710463	1.34609	0.9932	0.410169	0.424551	0.991683	0.9787	0.72032	0.886303	0.649487	0.678458	0.954391	0.974248	0.360451	0.376701	0.898608	0.883917	0.704162	0.800004	0.674903	0.629003	0.944181	0.885932	0.443684	0.44944	0.626527	0.328097	0.517159	0.305138	0.716113	0.236286	0.990973	0.229799	0.44086	0.306148	0.677842
±SD	0.334674	0.324776	0.296113	0.47228	0.112332	0.143083	0.62516	0.556965	0.0387423	0.041115	0.332539	0.22659	0.603666	0.761759	0.171582	0.2247	0.328206	0.259391	0.0542538	0.0798222	0.21469	0.285906	0.73802	0.689395	0.0410572	0.24226	0.250288	0.182724	0.120126	0.103829	0.429121	0.145932	0.289948	0.038022	0.41925	0.00175286	0.0339421	0.0619553	0.0616388	0.0261436	0.211112
Vmc	0.0197542	0.027794	0.0143856	0.0393916	0.0293521	0.0210976	0.0441907	0.0305566	0.0122313	0.01374	0.0263401	0.0324464	0.0223441	0.0237624	0.0182199	0.0181015	0.0363521	0.0427017	0.0127664	0.0118584	0.027856	0.0271484	0.0242515	0.0293378	0.0207674	0.0189399	0.0376409	0.0337813	0.0140438	0.0133112	0.0216377	0.00928715	0.0147981	0.00940262	0.0240075	0.00785063	0.0351551	0.00773497	0.0151522	0.0105014	0.021841
±SD	0.00987585	0.0161702	0.00809941	0.0296166	0.00152508	0.00576142	0.0210705	0.0184987	0.00275932	0.000236067	0.00872187	0.0113422	0.0197076	0.0203835	0.00663379	0.00949221	0.0142656	0.0291572	0.00270334	0.00269924	0.0118593	0.00767385	0.0211983	0.0268133	0.00258352	0.00671571	0.00883029	0.0078674	0.00384617	0.00297262	0.0154912	0.00450144	0.0079661	0.00121674	0.0126177	0.00105604	0.0041176	0.00280634	0.00266966	0.00132472	0.00748595
Vv	0.546708	0.635315	0.356892	0.485126	0.54349	0.467176	0.906939	0.685976	0.269635	0.282595	0.654787	0.669604	0.414006	0.529118	0.449169	0.492861	0.645779	0.644029	0.251603	0.272494	0.629725	0.613335	0.461668	0.518843	0.451261	0.426125	0.652618	0.602533	0.310491	0.293687	0.443129	0.230206	0.353352	0.216038	0.470623	0.164005	0.65964	0.156938	0.298349	0.212228	0.49341
±SD	0.262527	0.208394	0.190774	0.281228	0.0822159	0.0668367	0.387838	0.362186	0.0154907	0.0496084	0.201995	0.135673	0.307121	0.411088	0.120168	0.135962	0.19068	0.145452	0.0312737	0.0556876	0.165618	0.166098	0.489785	0.462775	0.0337511	0.145342	0.191404	0.141673	0.0742613	0.0561175	0.294701	0.0983562	0.204897	0.0247436	0.201903	0.00409944	0.0220388	0.0448679	0.0287141	0.0192927	0.156843
Vvc	0.655583	0.817846	0.473594	0.692771	0.719407	0.646151	1.24359	0.909662	0.380285	0.386333	0.887995	0.865706	0.634598	0.794123	0.574544	0.605569	0.859445	0.863882	0.330161	0.342672	0.82003	0.800007	0.61923	0.701084	0.588055	0.562542	0.86404	0.801482	0.410324	0.418283	0.522088	0.283039	0.466485	0.27071	0.644374	0.208599	0.908969	0.189866	0.405221	0.269141	0.594729
±SD	0.333488	0.308869	0.263385	0.430069	0.0971134	0.147229	0.586978	0.526556	0.0372476	0.0320445	0.323638	0.215224	0.554267	0.718196	0.162119	0.217868	0.294907	0.225753	0.0480251	0.0726733	0.213948	0.286627	0.641831	0.602362	0.0179923	0.22076	0.241615	0.172014	0.114624	0.0969987	0.370284	0.129095	0.255108	0.0315385	0.393258	0.00347145	0.0381749	0.0492928	0.0574235	0.0272803	0.176328
Vvv	0.0987804	0.0946087	0.0587485	0.0850573	0.0798737	0.0643115	0.106754	0.0843006	0.0303289	0.039449	0.108193	0.120161	0.0880844	0.0867604	0.0698924	0.0723263	0.0941821	0.097582	0.0304757	0.0335808	0.086446	0.0854068	0.0965812	0.100772	0.0860037	0.0716165	0.0782911	0.0816082	0.0333582	0.0323893	0.104439	0.0449884	0.0571944	0.0344114	0.0723463	0.0276866	0.0851539	0.0399337	0.0372377	0.0361267	0.0800505
±SD	0.012979	0.0111466	0.0298955	0.0647666	0.0162034	0.0132036	0.0405961	0.0298473	0.00268738	0.0113664	0.021821	0.0248977	0.0615374	0.0583989	0.0180793	0.0175498	0.0486758	0.0365692	0.00524117	0.00857291	0.00714716	0.0134814	0.116225	0.0981323	0.022252	0.0355542	0.0125063	0.0136262	0.00758847	0.00847518	0.0613967	0.018225	0.0438561	0.00650003	0.0268502	0.00171859	0.00582929	0.012921	0.00431918	0.00326902	0.0294096

## Sheet: Tabel S5
Table S5: Descriptive statistics (mean ±SD) for all DMT parameters for the sandblasting experiment (see Table S2). For parameter descriptions, see Table S3.
	loess (221–513 μm)		Feinsand 12c
	Mammuthus sp.		Mammuthus sp.		Antelope
	n=3	n=3	n=3	n=3	n=4
Parameter	before sanblasting	after sanblasting	before sanblasting	after sanblasting	potentially natural altered
Area
Sda	29.1567	32.2222	34.8404	187.287	33.2148
±SD	2.69971	3.6041	6.81183	28.6114	13.4202
Sha	29.1909	35.3409	35.0435	302.743	34.7357
±SD	3.15873	4.23433	6.66342	25.0831	10.6147
mea	32.0109	38.3989	38.0037	375.573	233.423
±SD	3.34427	4.23519	7.02332	69.8849	133.549
Complexity
Sdr	3.48079	3.09677	1.79231	11.9617	5.34004
±SD	0.732926	0.180303	0.557811	2.54252	1.51344
nMotif	807.833	680.5	692.333	70.1667	154.625
±SD	81.4898	70.963	132.674	13.7326	73.0426
Asfc	6.59334	5.78452	3.42263	15.3608	8.98912
±SD	1.47474	0.262493	1.13025	3.55298	1.93759
Density
Sal	5.37774	5.64954	6.00277	14.9571	17.6638
±SD	0.158155	0.204344	0.930065	1.31098	2.28346
Spd	0.0321354	0.0260221	0.0264193	0.00251953	0.0289307
±SD	0.00386089	0.00334106	0.00629153	0.00031974	0.00509391
medf	4532.84	4454.37	4384.62	4207.99	4693.33
±SD	36.3438	81.9953	180.331	98.8077	164.911
Direction
Std	71.3341	98.4578	51.4178	93.5006	92.5952
±SD	38.183	8.9183	47.2737	17.358	50.3361
Str	0.763036	0.757874	0.704949	0.757599	0.500364
±SD	0.0301202	0.0310783	0.0860684	0.0390433	0.0726012
Tr1R	75.0002	89.9939	67.507	101.905	84.3662
±SD	12.9903	0.0091156	22.4986	11.3022	46.391
Tr2R	63.084	53.0887	38.8642	67.4985	89.9988
±SD	16.3468	26.2116	27.2179	22.5073	29.1847
Tr3R	25.6895	48.2449	47.661	68.8341	79.7428
±SD	5.34627	22.3766	32.7841	20.6246	30.6204
IsT	77.6559	75.5208	72.6121	79.8562	83.2299
±SD	3.62264	1.89046	7.1737	5.30645	2.0574
epLsar	0.0172143	0.0170009	0.0176135	0.0174493	0.0176469
±SD	0.000334648	0.000136274	0.000660844	0.000339713	6.78035e-05
Height
S10z	1.41705	1.35511	1.0064	6.77589	2.42959
±SD	0.130936	0.184434	0.140539	0.715172	0.721324
S5p	0.63074	0.547268	0.45192	2.1828	1.1433
±SD	0.0680174	0.0505199	0.0523183	0.589789	0.569609
S5v	0.762502	0.80401	0.57237	4.52186	1.25331
±SD	0.0855815	0.194638	0.0860332	0.424351	0.242288
Sa	0.209023	0.211322	0.161648	1.20433	0.602784
±SD	0.0173437	0.00986779	0.00924629	0.164259	0.226279
Sku	3.16179	3.51688	3.1343	4.1193	3.55187
±SD	0.23642	0.783533	0.201089	0.737145	0.789394
Sp	0.825079	0.846144	0.631997	4.05714	2.4805
±SD	0.0482286	0.0267128	0.0204428	0.785345	0.614626
Sq	0.264879	0.267665	0.203919	1.57903	0.759799
±SD	0.0221883	0.0146123	0.0121703	0.163119	0.275699
Ssk	-0.250381	-0.413814	-0.192379	-0.94225	-0.328642
±SD	0.153227	0.277523	0.120227	0.286435	0.200589
Sv	0.937422	0.98766	0.725323	6.3864	3.45665
±SD	0.0676955	0.143038	0.0243167	0.289074	1.45423
Sxp	0.567478	0.587271	0.42778	4.24596	1.58158
±SD	0.0402529	0.0438072	0.0542559	0.168945	0.460223
Sz	1.74444	1.81326	1.37916	10.3539	6.07329
±SD	0.0811219	0.123413	0.0637279	1.05568	2.07967
meh	0.179355	0.178095	0.146126	0.926171	0.470351
±SD	0.0135702	0.00949295	0.0053001	0.128924	0.166978
madf	1.30933	1.29359	1.02121	6.40479	2.32183
±SD	0.0745716	0.187292	0.0882155	1.19656	0.510844
metf	0.438792	0.420124	0.321746	1.50845	0.628055
±SD	0.0488953	0.0173209	0.0365707	0.107602	0.153143
FLTt	0.760992	0.74832	0.597589	7.08672	3.16897
±SD	0.0212195	0.0876183	0.0466616	1.06909	1.0913
FLTp	0.326141	0.348182	0.280346	2.3711	1.51973
±SD	0.0309818	0.0280265	0.0131597	0.704445	0.649733
FLTv	0.42146	0.417393	0.312772	4.72674	1.63086
±SD	0.00262554	0.0763209	0.0520401	0.364359	0.473483
FLTq	0.116855	0.120783	0.0991935	1.22775	0.596522
±SD	0.00811515	0.0102965	0.00679981	0.0830838	0.257027
Peak sharpness
Spc	0.643193	0.572938	0.427517	1.9088	1.05826
±SD	0.0905136	0.0736562	0.0617588	0.496148	0.209527
Plateau size
Smc	0.331317	0.329245	0.257263	1.67026	0.956332
±SD	0.0314155	0.0153334	0.00992952	0.228482	0.378833
Smr	75.875	73.3235	95.451	0.951016	2.88784
±SD	7.23308	2.70637	0.813948	0.539466	2.51439
Slope
Sdq	0.269313	0.254575	0.190564	0.577696	0.337182
±SD	0.0300941	0.00786808	0.0296386	0.0731571	0.0500526
Volume
Sdv	0.48918	0.562828	0.433956	13.1727	0.587014
±SD	0.0690842	0.129484	0.0637287	3.1674	0.353806
Shv	0.573247	0.710164	0.551222	16.2124	0.521854
±SD	0.0132683	0.134175	0.099238	1.96454	0.234456
Vm	0.0117184	0.0109586	0.00911817	0.04768	0.0308204
±SD	0.00146636	0.000449143	0.000386596	0.0154294	0.00983351
Vmp	0.34258	0.340222	0.26623	1.71624	0.986569
±SD	0.0329396	0.0157504	0.00999353	0.242442	0.388883
Vmc	0.0117184	0.0109586	0.00911817	0.04768	0.0308204
±SD	0.00146636	0.000449143	0.000386596	0.0154294	0.00983351
Vv	0.23512	0.23917	0.181972	1.37148	0.693146
±SD	0.0185395	0.00988936	0.0119973	0.241746	0.268673
Vvc	0.308675	0.305111	0.240915	1.43891	0.895019
±SD	0.0315595	0.0133809	0.00830383	0.24477	0.361255
Vvv	0.0339057	0.03542	0.0253019	0.27031	0.0931812
±SD	0.00287601	0.00392513	0.00354311	0.020739	0.0263214

## Sheet: Table S6
Table S6: Descriptive statistics (mean ±SD) for all DMT parameters for the acid etching experiment (see Table S2). For parameter descriptions, see Table S3.
	pH value 1.3, 42 °C		pH 2, 25 °C
	Otomys sp.		Crocodylus niloticus		Charcharhinus plumbeus		Otomys sp.	Otomys irroratus
	n=3	n=3	n=3	n=3	n=3	n=3	n=8	n=8
Parameter	before etching	after etching	before etching	after etching	before etching	after etching	extracted form owl pellets	trapped alive
Area
Sda	61.192	14.5448	114.356	112.07	52.913	17.5461	41.0578	50.8355
±SD	19.371	2.60709	46.9103	51.4719	27.0956	8.06327	12.304	36.3587
Sha	66.3051	27.1233	94.7756	75.4632	70.0684	19.9633	47.5713	38.5888
±SD	34.6963	16.7244	22.0335	22.4451	14.875	9.63057	23.6913	13.3506
mea	284.934	228.004	652.33	141.166	381.358	67.4124	187.986	237.622
±SD	50.8444	176.078	98.0456	56.0046	48.1285	35.0723	105.79	140.047
Complexity
Sdr	3.0115	26.26	4.89213	18.0918	0.796071	18.4496	2.72891	2.509
±SD	0.896797	23.0227	1.3743	1.24372	0.307109	9.28942	0.852097	0.995833
nMotif	13.1667	35	41.5	207.333	70.6667	510.333	25.5	20.6875
±SD	2.02073	38.7201	5.89491	96.0069	11.5794	369.654	12.1332	9.73557
Asfc	4.03962	24.7415	7.16873	25.4193	1.49138	32.5203	4.00833	3.47519
±SD	1.64289	17.3291	1.34336	2.42123	0.658397	16.4894	1.23138	0.86372
Density
Sal	7.74946	4.22717	12.4413	9.35073	17.7666	4.93126	6.74118	6.85699
±SD	0.407562	2.94672	0.436252	1.39879	1.35604	4.34941	0.651045	0.838712
Spd	0.0100259	0.0399649	0.00162109	0.00925781	0.0102799	0.0607813	0.0184867	0.0156799
±SD	0.00520898	0.0289068	0.000206699	0.00333727	0.00396799	0.0422357	0.00843566	0.00985862
medf	4366.59	5228.02	4196.39	4929.94	4307.51	4702.07	4496.99	4506.4
±SD	356.058	220.081	173.838	161.94	406.351	536.95	103.559	201.586
Direction
Std	83.0007	76.2053	84.4169	92.916	83.6248	82.584	18.0443	48.8923
±SD	52.6641	67.5933	4.05465	6.2712	21.8631	15.909	7.64518	58.8145
Str	0.401406	0.535674	0.318444	0.429201	0.480218	0.193526	0.464047	0.386734
±SD	0.136417	0.0959084	0.0962523	0.0629367	0.118946	0.116917	0.140005	0.117421
Tr1R	25.6714	26.9545	90.0007	90.0045	82.2481	80.1746	9.52529	13.0023
±SD	23.0366	23.6975	0.020731	0.00700855	26.6234	11.5076	13.0044	16.373
Tr2R	56.9027	82.5019	82.7772	46.9588	83.0276	86.7989	25.179	30.3168
±SD	29.038	34.3679	13.1154	47.7318	18.2765	23.175	10.2457	7.88868
Tr3R	34.4161	87.3478	68.2568	71.0164	70.3334	91.5653	36.8236	39.5953
±SD	11.3067	41.2756	5.17164	12.989	27.6919	29.7213	18.8918	9.80687
IsT	57.0639	66.8451	24.6473	50.8146	20.8096	15.5789	36.5723	34.7659
±SD	21.601	8.4531	10.9302	5.09544	14.1458	7.59961	18.2952	12.1536
epLsar	0.0186175	0.0183603	0.015508	0.017165	0.0159122	0.0160414	0.0193194	0.0188222
±SD	0.000761325	0.000389344	0.000704101	0.000482449	0.00171586	0.00105005	0.000985181	0.00122541
Height
S10z	2.03608	11.3932	6.25579	8.60998	0.893762	4.09666	1.50142	1.42794
±SD	0.470328	10.5477	0.620834	2.6103	0.259858	1.7768	0.370521	0.494512
S5p	0.68581	1.20195	2.60178	5.50123	0.393029	1.59913	0.54992	0.528802
±SD	0.26267	0.637155	1.01293	1.61474	0.154234	2.09477	0.18128	0.0849976
S5v	1.26708	10.1376	3.07349	3.06061	0.460502	2.42931	0.923607	1.16473
±SD	0.183199	9.98687	0.816483	2.32062	0.0794994	1.39311	0.286642	0.88445
Sa	0.507882	0.530412	0.608064	0.616431	0.234785	0.534956	0.373672	0.364869
±SD	0.0237447	0.242532	0.178149	0.117408	0.0473558	0.19417	0.104158	0.148049
Sku	3.06244	40.6665	5.32498	9.83664	2.87738	5.56457	4.34359	4.26967
±SD	0.50786	32.8531	1.85112	3.60865	0.219033	1.46795	1.08162	1.09569
Sp	1.69224	2.28322	5.42648	7.80984	0.912365	2.87181	1.49272	1.77601
±SD	0.187019	0.666951	1.96201	1.62067	0.249638	1.77347	0.464297	1.32075
Sq	0.64054	0.937367	0.813702	0.889651	0.290784	0.689279	0.488964	0.471509
±SD	0.0248623	0.672659	0.270731	0.18052	0.0613364	0.2635	0.132298	0.175277
Ssk	-0.340648	-3.77191	0.213129	0.80558	-0.168892	-0.0473366	-0.611607	-0.51053
±SD	0.00973594	3.30194	0.785776	0.631878	0.181736	0.851657	0.448167	0.504591
Sv	2.58775	10.5908	4.83594	5.32481	1.19526	3.07411	1.97668	2.30743
±SD	0.894778	9.81184	1.07144	2.25828	0.237452	1.14641	0.479641	1.90738
Sxp	1.35798	1.34126	1.58183	1.53012	0.6028	1.19971	1.08884	0.945171
±SD	0.0959802	0.589091	0.492249	0.234204	0.136086	0.37409	0.289528	0.110164
Sz	4.33842	13.1608	10.3273	13.4119	2.17647	5.72198	3.53092	4.17567
±SD	1.01075	10.4618	2.57563	3.15605	0.544477	1.94437	0.92792	2.63572
meh	0.483249	0.869662	1.14832	1.39118	0.189783	0.558509	0.369238	0.528819
±SD	0.0791837	0.647134	0.290611	0.317659	0.0540145	0.261629	0.144852	0.502915
madf	1.32391	8.02107	3.77176	6.05468	1.18949	3.73082	1.11777	1.09384
±SD	0.154203	10.217	0.73743	2.14943	0.230135	1.5716	0.184694	0.965995
metf	0.368516	0.760341	0.676148	0.99165	0.249956	0.992107	0.310254	0.290816
±SD	0.0259087	0.575189	0.171102	0.128807	0.043093	0.390321	0.0541476	0.0747099
FLTt	1.65337	1.28151	5.10353	5.17094	1.22148	1.85125	1.08075	1.06142
±SD	0.183674	0.264776	1.92328	0.567078	0.293792	0.570957	0.303099	0.455416
FLTp	0.86652	0.577307	2.40777	2.52623	0.595501	0.871672	0.48598	0.526123
±SD	0.224088	0.15928	0.793005	0.319112	0.151285	0.341114	0.151936	0.279368
FLTv	0.747696	0.775724	2.71178	2.67306	0.652468	0.940493	0.559486	0.534502
±SD	0.110655	0.230638	1.14973	0.381162	0.130298	0.280612	0.166163	0.235571
FLTq	0.437958	0.310335	1.14169	1.02856	0.229683	0.302951	0.233718	0.258329
±SD	0.0480642	0.0223188	0.460224	0.0659402	0.0460565	0.0775189	0.0720942	0.142392
Peak sharpness
Spc	0.662348	2.45715	15.4964	16.319	0.390289	2.17873	0.65203	0.705175
±SD	0.358502	1.37854	2.32826	4.55202	0.121743	0.467509	0.144824	0.384933
Plateau size
Smc	0.804304	0.763162	0.928664	0.958325	0.36507	0.854006	0.570691	0.560766
±SD	0.101297	0.318182	0.230397	0.231874	0.0769613	0.307344	0.156048	0.259527
Smr	20.1748	3.0987	0.0384787	0.0349382	64.0883	7.22441	31.1514	33.3568
±SD	10.6048	1.15545	0.0206787	0.0267177	28.8471	7.98733	26.4801	31.4951
Slope
Sdq	0.251564	1.29511	0.419401	0.966552	0.126479	0.752843	0.237161	0.241338
±SD	0.0421331	1.05976	0.0434159	0.176852	0.0259704	0.268113	0.0386973	0.076272
Volume
Sdv	0.817127	0.803569	2.90077	5.35232	0.287198	0.40885	0.363535	0.950648
±SD	0.407021	0.703476	0.518193	3.27345	0.213839	0.220529	0.114218	1.48565
Shv	0.441633	1.12651	6.24541	5.26602	0.397157	0.434831	0.424882	0.382138
±SD	0.109023	1.25043	1.99886	2.65906	0.233126	0.256705	0.251055	0.325866
Vm	0.0206765	0.0287488	0.0427017	0.0627832	0.0118584	0.0325644	0.0189808	0.018293
±SD	0.00180746	0.0167188	0.0291572	0.0173082	0.00269924	0.0160379	0.00683417	0.00763404
Vmp	0.825371	0.800151	0.974248	1.00758	0.376701	0.886559	0.591953	0.582955
±SD	0.102434	0.329034	0.259391	0.2387	0.0798222	0.314837	0.162601	0.268527
Vmc	0.0206765	0.0287488	0.0427017	0.0627832	0.0118584	0.0325644	0.0189808	0.018293
±SD	0.00180746	0.0167188	0.0291572	0.0173082	0.00269924	0.0160379	0.00683417	0.00763404
Vv	0.587013	0.493743	0.644029	0.643869	0.272494	0.598963	0.4035	0.38768
±SD	0.0513556	0.0972351	0.145452	0.112194	0.0556876	0.219523	0.112545	0.154829
Vvc	0.741115	0.652337	0.863882	0.908572	0.342672	0.807391	0.519708	0.518792
±SD	0.1042	0.189773	0.225753	0.221513	0.0726733	0.28309	0.145479	0.264719
Vvv	0.0796119	0.12913	0.097582	0.0960076	0.0335808	0.0741921	0.0683976	0.056523
±SD	0.00532331	0.101294	0.0365692	0.0183694	0.00857291	0.0285475	0.0177043	0.00512404

## Sheet: Table S7
Table S7: Statistical results from Wilcoxon Signed-Rank Test for the different experiments. Significances confirmed are highlighted in red.
	Equus sp.	Charcharhinus plumbeus	Crocodilus niloticus	Otomys sp.	Capreolus capreolus	Mammuthus sp.
tumbling experiment with very fine sand (51–168 μm)	0.1105	0.02414	0.005842	7.192e-12	3.408e-05	-
tumbling experiment with fine sand (112–292 μm)	0.2373	0.3346	0.7677	0.05337	0.03925	-
tumbling experiment with medium sand (221–513 μm)	0.7036	0.7163	0.0004692	0.02927	0.06251	-
tumbling experiment with fine-grained gravel (2–8 mm)	0.002372	0.8036	9.63e-05	0.007256	0.07596	-
sandblasting experiment with loess	-	-	-	-	-	0.7211
sandblasting experiment with Feinsand 12c	-	-	-	-	-	3.1e-12
acid etching experiment, pH 1.3, Temperature 42 °C	-	-	-	0.02147	-	-
acid etching experiment, pH 2, Temperature 25 °C	-	5.538e-05	0.000159	-	-	-

## Sheet: Table S8
Table S8: Statistical results for all DMT parameters for Hippotherium primigenium species and all experimentally altered dental specimens before and after the tumbling experiment. For parameter description, see Table S3. Significances from Lincon and confirmed by Cliff’s method.
		Equus sp.	Capreolus capreolus	Otomys sp.	Crocodilus niloticus	Carcharhinus plumbeus
very fine sand (51–168 μm)	t=0	medf 0.046, S5v 0.005	IsT 0.012	nmotif 0.018, FLTp 0.022, FLTq 0.023, FLTv 0.006, FLTt 0.013, Sal 0.000	nmotif 0.018, medf 0.003, epLsar 0.026, mea 0.049, FLTp 0.038, FLTq 0.037, FLTv 0.036, FLTt 0.033, meh 0.033, IsT 0.036, S10z 0.032, S5p 0.008, Sda 0.048, Sdv 0.000, Sku 0.012, Spc 0.000, Spd 0.001, Ssk 0.017, Str 0.019, Sz 0.042	nmotif 0.018, Asfc 0.004, metf 0.008, epLsar 0.001, FLTv 0.026, IsT 0.000, madf 0.002, S10z 0.018, S5v 0.001, Sal 0.006, Sdq 0.002, Sdr 0.006, Sku 0.000, Smr 0.000, Spc 0.002, Spd 0.021, Ssk 0.000, Str 0.000, Sv 0.002, Sxp 0.029, Sz 0.016, Vvv 0.015
	t=336	medf 0.000, metf 0.026	-	mea 0.009, FLTp 0.010, FLTq 0.011, FLTv 0.004, FLTt 0.005, IsT 0.029, madf 0.008, S5v 0.034, Sal 0.000, Sda 0.027, Sku 0.009, Ssk 0.002, Sv 0.016, Vvv 0.043	medf 0.019, S5p 0.014, S5v 0.002, Sha 0.021, Shv 0.035, Sku 0.006, Spd 0.001	epLsar 0.006, IsT 0.001, Sal 0.016, Sku 0.002, Smr 0.004, Str 0.016, Sz 0.035
fine sand (112–292 μm)	t=0	medf 0.013	IsT 0.008, Sal 0.018, Str 0.001	nmotif 0.018, epLsar 0.042, FLTp 0.009, FLTq 0.025, FLTv 0.005, FLTt 0.008, IsT 0.030, madf 0.007, Sal 0.000, Sku 0.020, Ssk 0.002, Str 0.046, Sv 0.010	medf 0.006, Spd 0.002	nmotif 0.016, Asfc 0.005, epLsar 0.003, mea 0.030, FLTv 0.028, IsT 0.000, madf 0.004, S10z 0.023, S5v 0.005, Sal 0.005, Sdq 0.002, Sdr 0.006, Sku 0.001, Smr 0.020, Spc 0.002, Spd 0.003, Ssk 0.000, Sv 0.004, Sxp 0.029, Sz 0.021, Vvv 0.015
	t=336	medf 0.001, metf 0.031, Sda 0.021, Sha 0.041, Shv 0.049, Spd 0.004	IsT 0.036, Str 0.041	nmotif 0.018, FLTp 0.012, FLTq 0.031, FLTv 0.005, FLTt 0.008, Sal 0.000	nmotif 0.032, medf 0.005, epLsar 0.005, mea 0.003, mea 0.024, IsT 0.005, madf 0.031, S10z 0.000, S5v 0.045, Spd 0.006, Sdv 0.006, Sha 0.031, Shv 0.036, Spc 0.008, Spd 0.001, Str 0.009, Sv 0.038, Sz 0.044, Vmc 0.044	Asfc 0.011, IsT 0.012, S10z 0.027, S5v 0.003, Sal 0.007, Sdq 0.009, Sdr 0.013, Sha 0.034, Sku 0.001, Spd 0.008, Ssk 0.016, Sv 0.007, Sz 0.022, Vvv 0.026
medium sand (221–513 μm)	t=0	medf 0.001	-	nmotif 0.015, medf 0.016, epLsar 0.025, FLTp 0.013, FLTt 0.018, IsT 0.001, Sal 0.000	nmotif 0.027, epLsar 0.001, FLTp 0.044, IsT 0.000, Sha 0.013, Sku 0.018, Spd 0.001, Ssk 0.002, Str 0.001, Vm 0.033, Vmp 0.033	nmoti 0.017, Asfc 0.005, IsT 0.001, madf 0.004, S10z 0.036, S5v 0.004, Sal 0.017, Sda 0.009, Sdq 0.002, Sdr 0.007, Sha 0.028, Sku 0.000, Spc 0.002, Spd 0.003, Ssk 0.003, Sv 0.004, Sz 0.021, Vvv 0.023
	t=336	medf 0.001, Spd 0.003	nmotif 0.031,Spd 0.030	nmotif 0.019, medf 0.008, FLTp 0.008, FLTq 0.034, FLTv 0.010, FLTt 0.010, IsT 0.014, Sal 0.000	nmotif 0.021, medf 0.044, epLsar 0.002, FLTq 0.041, FLTt 0.037, IsT 0.003, Sda 0.0365, Sdv 0.006, Sku 0.018, Smc 0.028, Spc 0.038, Spd 0.001, Sq 0.042, Ssk 0.001, Str 0.002, Vm 0.037, Vmp 0.037, Vv 0.033, Vvc 0.034	nmoti 0.034, Asfc 0.006, medf 0.000, epLsar 0.006, IsT 0.005, madf 0.006, S10z 0.031, S5v 0.004, Sal 0.016, Sdq 0.003, Sdr 0.008, Sku 0.000, Smr 0.045, Spd 0.001, Ssk 0.000, Sv 0.005, Sxp 0.036, Sz 0.020, Vvv 0.022
fine to medium gravel (2–8 mm)	t=0	-	medf 0.046, FLTp 0.024, FLTq 0.017, FLTv 0.009, FLTt 0.021, madf 0.005, S10z 0.026, S5v 0.006, Sa 0.014, Sdq 0.028, Sdr 0.025, Smc 0.019, Spc 0.017, Sq 0.015, Ssk 0.009, Sv 0.029, Sxp 0.009, Vmc 0.012, Vv 0.021, Vvv 0.008	n.a.	nmotif 0.021, medf 0.025, metf 0.002, epLsar 0.002, FLTp 0.003, FLTq 0.039, FLTt 0.037, meh 0.027, IsT 0.000, S5v 0.032, Sa 0.002, Sda 0.005, Sdv 0.044, Smc 0.000, Spd 0.001, Sq 0.002, Ssk 0.000, Str 0.000, Sz 0.046, Vm 0.001, Vmc 0.001, Vmp 0.001, Vv 0.000, Vvc 0.000	nmoti 0.021, Asfc 0.005, medf 0.001, epLsar 0.002, IsT 0.012, madf 0.006, S10z 0.023, S5v 0.003, Sal 0.005, Sda 0.002, Sdq 0.003, Sdr 0.007, Sha 0.018, Sku 0.001, Smr 0.008, Spc 0.002, Spd 0.002, Ssk 0.000, Sz 0.029, Vvv 0.037
	t=336	nmoti 0.000, mea 0.009, FLTp 0.006, FLTq 0.007, FLTv 0.013, FLTt 0.010, IsT 0.043, Sa 0.019, Sal 0.000, Sda 0.008, Sha 0.006, Smc 0.019, Spd 0.000, Sq 0.019, Sxp 0.023, Vm 0.011, Vmc 0.018, Vmp 0.011, Vv 0.018, Vvc 0.018, Vvv 0.027	Asfc 0.028, mea 0.006, FLTp 0.006, FLTq 0.006, FLTv 0.007, FLTt 0.007, Sa 0.026, Sal 0.005, Sda 0.005, Sha 0.003, Smc 0.031, Smr 0.045, Spd 0.018, Sq 0.021, Sxp 0.019, Vm 0.019, Vmc 0.028, Vmp 0.019, Vv 0.030, Vvc 0.034, Vvv 0.015	n.a.	medf 0.004, Sa 0.021, Sal 0.000, Sha 0.028, Sku 0.020, Smc 0.016, Spd 0.004, Ssk 0.035, Vmc 0.014, Vv 0.016, Vvc 0.013	nmoti 0.018, epLsar 0.028, mea 0.014, FLTp 0.019, FLTq 0.016, FLTv 0.011, FLTt 0.015, Sa 0.048, Sal 0.000, Sq 0.042, Sxp 0.038, Vmc 0.047, Vvv 0.032

## Sheet: Table S9
Table S9: Statistical results for all DMT parameters for Otomys teeth of trapped (Otomys irroratus) species, Otomys sp. extracted from owl pellets and experimentally altered Otomys teeth before and after acid etching. For parameter description, see Table S3. Significances confirmed by Cliff’s method are highlighted in bold.
	Welch-Yuen	trapped alive	trapped alive		extracted from owl pellets
		extracted from owl pellets	before acid etching experiment	after acid etching experiment	before acid etching experiment	after acid etching experiment
Area
Sda	0.00798556
Sha	0.0183045	trapped < pellet			pellet < experiment	experiment < pellet
mea	0.000420549	pellet < trapped	trapped < experiment	trapped < experiment	pellet < experiment
Complexity
Sdr	6.21574e-06		trapped < experiment	trapped < experiment
nMotif	0.000906538		experiment < trapped
Asfc	8.93905e-05		trapped < experiment	trapped < experiment
Density
Sal	1.19645e-05	pellet < trapped	trapped < experiment	experiment < trapped
Spd	0.00720019
medf	0.0159084
Direction
Std	5.89339e-06
Str	0.185045	trapped < pellet
Tr1R	2.20742e-05
Tr2R	0.00410252
Tr3R	0.0124831
IsT	0.00348561					pellet < experiment
epLsar	0.00331215
Height
S10z	0.000250678		trapped < experiment	trapped < experiment
S5p	0.0356347			trapped < experiment
S5v	0.00326486		trapped < experiment
Sa	0.00329107			trapped < experiment
Sku	0.0447089
Sp	0.00497666			trapped < experiment		pellet < experiment
Sq	0.00283			trapped < experiment
Ssk	0.207544
Sv	0.0172955		trapped < experiment
Sxp	0.0053607			trapped < experiment
Sz	0.00739607		trapped < experiment	trapped < experiment		pellet < experiment
meh	0.00342034		trapped < experiment	trapped < experiment		pellet < experiment
madf	0.0154168		trapped < experiment
metf	0.00154837		trapped < experiment	trapped < experiment
FLTt	0.00292988			trapped < experiment		pellet < experiment
FLTp	0.00118141			trapped < experiment		pellet < experiment
FLTv	0.000548555			trapped < experiment		pellet < experiment
FLTq	1.83399e-05			trapped < experiment		pellet < experiment
Peak sharpness
Spc	0.000349684	pellet < trapped	trapped < experiment	trapped < experiment	pellet < experiment	pellet < experiment
Plateau size
Smc	0.0155262		trapped < experiment	trapped < experiment
Smr	0.011226
Slope
Sdq	0.000475551		trapped < experiment	trapped < experiment
Volume
Sdv	0.00808386		trapped < experiment		pellet < experiment
Shv	0.0486045		trapped < experiment		pellet < experiment
Vm	0.0263951			trapped < experiment
Vmp	0.00753262		trapped < experiment	trapped < experiment
Vmc	0.0263951			trapped < experiment
Vv	0.0154612		trapped < experiment	trapped < experiment
Vvc	0.0200005		trapped < experiment	trapped < experiment
Vvv	0.00569601			trapped < experiment

## Sheet: Table S10
Table S10: Importance of components for PCA from the different types ofexperimentally altered enamel surfaces scans using 12 DMT parameter (Smr, medf, Spd, nMotif, Asfc, Spc, metf, Vm, Sq, FLTt, IsT, mea). Factor loadings for the parameter values are represented with values cut-off +/- 0.4 marked in red.
			PC1	PC2	PC3	PC4	PC5	PC6	PC7	PC8	PC9	PC10	PC11	PC12
tumbling experiment with very fine sand (51–168 μm)	Standard deviation		2.48	1.435	1.255	0.8303	0.761	0.6026	0.4264	0.3605	0.3527	0.28874	0.18686	0.17136
	Proportion of Variance		0.513	0.172	0.131	0.0575	0.0483	0.0303	0.0152	0.0108	0.0104	0.00695	0.00291	0.00245
	Cumulative Proportion		0.513	0.684	0.815	0.8728	0.9211	0.9514	0.9665	0.9773	0.9877	0.99464	0.99755	1
	Factor loadings	Sq	-0.374515	-0.011576	0.03953	-0.108842	0.276481	-0.282603	0.246855	-0.452087	0.015341	-0.234085	-0.0046647	0.607879
		Smr	0.310818	0.041638	0.406388	-0.067283	-0.056675	0.211895	0.798874	0.086505	-0.157363	0.082052	0.0613879	0.054059
		Vm	-0.357493	-0.043344	0.106461	0.123273	0.372518	-0.238984	0.157935	0.705961	0.254717	0.154303	-0.187662	0.025982
		Spd	0.286486	-0.411198	0.161718	-0.132977	0.25019	-0.229626	-0.0294468	0.0042291	-0.164278	-0.567453	-0.395693	-0.288505
		Spc	-0.286074	-0.015518	0.186044	-0.407825	-0.716132	-0.188304	-0.0618246	0.277734	-0.153727	-0.162805	-0.124762	0.148399
		FLTt	-0.37876	0.001393	0.089478	-0.232606	-0.069053	0.071716	0.217743	-0.399551	0.384393	0.198234	-0.318707	-0.537432
		nMotif	0.215008	-0.389681	0.397382	-0.33084	0.074437	0.251921	-0.301315	0.0051687	0.501032	0.147431	0.12339	0.29451
		mea	-0.169188	0.491115	0.080821	-0.436205	0.364434	0.501269	-0.170212	0.135119	-0.208863	-0.232679	-0.060137	-0.026139
		metf	-0.360761	-0.245712	0.142881	0.093875	0.011701	0.086758	0.0690102	0.049748	0.023077	-0.372248	0.726484	-0.313797
		medf	0.278508	0.206072	-0.234541	-0.574418	0.14803	-0.520958	0.0865526	0.051227	0.10979	0.129506	0.366436	-0.168745
		Asfc	-0.210648	-0.520979	-0.164584	-0.255877	0.172517	0.104797	-0.0044953	-0.0144656	-0.570095	0.474116	0.0247332	-0.016342
		IsT	0.031886	-0.24418	-0.697298	-0.162322	-0.105839	0.346629	0.302955	0.171366	0.281943	-0.266188	-0.0759738	0.134778
tumbling experiment with fine sand (112–292 μm)	Standard deviation		2.487	1.34	1.209	0.9905	0.7651	0.5565	0.5056	0.4083	0.31799	0.27833	0.2395	0.14839
	Proportion of Variance		0.515	0.15	0.122	0.0818	0.0488	0.0258	0.0213	0.0139	0.00843	0.00646	0.00478	0.00183
	Cumulative Proportion		0.515	0.665	0.787	0.8687	0.9175	0.9433	0.9646	0.9785	0.98693	0.99339	0.99817	1
	Factor loadings	Sq	-0.365609	0.127357	-0.085964	0.173761	-0.220738	0.233328	-0.01435	0.357931	-0.10625	0.475534	0.546725	0.211447
		Smr	0.32205	-0.275624	0.101445	0.113771	-0.056956	-0.129352	-0.81047	0.338795	0.0083395	-0.0075177	0.031093	0.066086
		Vm	-0.355741	0.0067107	0.101476	0.283136	-0.014254	0.472887	-0.03244	0.325465	0.268674	-0.596918	-0.135441	-0.072757
		Spd	0.285353	0.398059	0.257763	0.208633	-0.186058	0.12868	0.056412	0.054088	0.470176	0.39213	-0.420146	0.203754
		Spc	-0.245907	-0.172424	0.478319	-0.033805	0.570494	0.106982	-0.166085	-0.342016	0.319469	0.183295	0.233117	0.091646
		FLTt	-0.374305	-0.0030511	0.143196	0.2315	-0.051158	0.0107369	-0.204428	-0.093752	-0.331151	0.340983	-0.404279	-0.585752
		nMotif	0.224575	0.118163	0.547485	0.287881	-0.427955	-0.0088271	0.05894	-0.324833	-0.206215	-0.24492	0.38041	-0.116417
		mea	-0.203929	-0.223796	-0.394589	0.588239	-0.160179	-0.342194	-0.04652	-0.37617	0.308213	-0.0218681	0.01147	0.156766
		metf	-0.369002	0.0706826	0.238084	-0.113535	-0.118336	-0.161708	-0.118563	-0.08513	-0.375204	-0.133388	-0.334333	0.676359
		medf	0.203533	0.355485	-0.046352	0.532569	0.601767	-0.120973	0.079666	0.1623	-0.349069	-0.0732937	0.026252	0.095241
		Asfc	-0.286183	0.372103	0.185333	-0.148695	-0.014088	-0.68769	-0.011085	0.297336	0.287562	-0.121193	0.135297	-0.21412
		IsT	-0.050512	0.62105	-0.328123	-0.175798	-0.001303	0.214962	-0.493111	-0.391751	0.0288123	-0.124706	0.108888	-0.045836
tumbling experiment with medium sand (221–513 μm)	Standard deviation		2.377	1.646	1.0764	0.9313	0.743	0.6922	0.4699	0.395	0.32709	0.2364	0.15766	0.14135
	Proportion of Variance		0.471	0.226	0.0966	0.0723	0.046	0.0399	0.0184	0.013	0.00892	0.00466	0.00207	0.00166
	Cumulative Proportion		0.471	0.697	0.7931	0.8654	0.911	0.9513	0.9697	0.983	0.99161	0.99626	0.99834	1
	Factor loadings	Sq	-0.396549	0.102584	-0.124668	0.092013	-0.211042	0.120524	-0.12314	0.219872	-0.082345	0.17497	0.135137	-0.793717
		Smr	0.300117	-0.202396	0.022086	-0.135148	-0.0216414	0.843599	-0.28233	-0.140095	-0.064387	-0.143107	0.0999718	-0.064235
		Vm	-0.404817	0.042351	0.039041	-0.016905	-0.117434	-0.0222663	-0.1853	0.241559	-0.433943	-0.564567	0.354969	0.304141
		Spd	0.239253	0.462147	0.038281	-0.037066	-0.0958045	-0.123787	-0.23545	-0.38333	-0.619361	0.332967	0.0687109	0.016261
		Spc	-0.268109	-0.079452	0.46358	-0.472132	0.382145	0.0424591	0.40194	-0.274868	-0.20021	-0.070248	-0.0011201	-0.232434
		FLTt	-0.393008	0.061937	0.010116	-0.197769	0.168422	0.24188	-0.12189	0.199525	0.138124	0.642175	0.2407	0.414185
		nMotif	0.14011	0.431805	0.202744	0.215867	0.685703	-0.0059542	-0.3272	0.218875	0.171323	-0.170464	0.0595747	-0.138049
		mea	-0.137553	-0.235319	-0.670023	-0.322402	0.380574	-0.195804	-0.33027	-0.247581	-0.044518	-0.078076	-0.0807304	-0.068431
		metf	-0.39447	0.095152	0.075021	0.216591	0.0058738	0.226363	-0.15049	-0.060562	-0.144135	-0.029526	-0.816244	0.131559
		medf	0.17155	0.344699	0.017906	-0.713531	-0.259911	-0.0564389	-0.12803	0.381209	0.140635	-0.110379	-0.277792	-0.026904
		Asfc	-0.285043	0.393557	0.017545	-0.024755	-0.236066	0.0412968	-0.0985	-0.58901	0.523195	-0.210534	0.171537	0.037321
		IsT	0.019645	0.445422	-0.519307	0.048938	0.138863	0.321218	0.6116	0.079059	-0.111256	-0.097189	0.012968	0.066187
tumbling experiment with fine-grained gravel (2–8 mm)	Standard deviation		2.446	1.505	1.151	0.8435	0.777	0.65	0.4938	0.4203	0.394	0.26035	0.1733	0.1274
	Proportion of Variance		0.499	0.189	0.11	0.0593	0.0503	0.0352	0.0203	0.0147	0.0129	0.00565	0.0025	0.00135
	Cumulative Proportion		0.499	0.687	0.798	0.857	0.9073	0.9425	0.9628	0.9776	0.9905	0.99614	0.9987	1
	Factor loadings	Sq	0.371171	-0.15934	0.14191	-0.183408	0.214375	-0.021553	0.144644	-0.0843135	0.300218	-0.363134	0.425742	-0.552595
		Smr	-0.292214	0.1515	-0.300629	-0.304358	0.364163	-0.465661	0.532338	0.228575	-0.050158	-0.120039	-0.031477	0.075138
		Vm	0.383097	-0.13122	0.016911	-0.103133	0.191765	-0.040092	-0.033522	-0.131216	0.471208	-0.274586	-0.336677	0.597987
		Spd	-0.305597	-0.27006	-0.10991	-0.211003	0.284519	-0.393002	-0.630989	-0.269091	0.118906	0.151291	-0.068393	-0.171504
		Spc	0.226774	-0.16761	-0.49412	0.00078092	-0.61032	-0.359599	-0.171785	0.285817	0.011441	-0.244963	0.028321	-0.048808
		FLTt	0.377683	-0.15829	0.018373	-0.231075	-0.039421	-0.051788	0.217344	0.13227	0.08109	0.608626	-0.479183	-0.320905
		nMotif	-0.285036	-0.25621	-0.302719	-0.196115	0.113152	0.59039	-0.094815	0.488826	0.329825	0.032951	0.061824	-0.003592
		mea	0.227608	0.31617	0.132646	-0.738073	-0.032483	0.122456	-0.296934	0.124784	-0.365005	-0.054116	0.100193	0.141061
		metf	0.308937	-0.36158	-0.212286	0.0954643	0.233367	-0.059233	0.04925	-0.0058291	-0.243633	0.407275	0.552899	0.358168
		medf	-0.309746	-0.13787	0.23628	-0.366467	-0.508041	-0.078324	0.26107	-0.274751	0.348177	0.217047	0.283769	0.195387
		Asfc	-0.100131	-0.60128	-0.053212	-0.178029	-0.054035	0.217914	0.21592	-0.306523	-0.483052	-0.315346	-0.262871	-0.032369
		IsT	-0.090318	-0.36259	0.647817	0.0827845	0.017759	-0.271954	-0.072871	0.572564	-0.092387	-0.092555	-0.011028	0.095969
sandblasting experiment	Standard deviation		3.006	1.307	0.7467	0.6378	0.3868	0.27845	0.20439	0.10912	0.1009	0.04011	0.01958	0.01209
	Proportion of Variance		0.753	0.142	0.0465	0.0339	0.0125	0.00646	0.00348	0.00099	0.00085	0.00013	3e-05	1e-05
	Cumulative Proportion		0.753	0.895	0.9417	0.9756	0.988	0.9945	0.99798	0.99897	0.99982	0.99996	0.99999	1
	Factor loadings	Sq	-0.329245	0.061479	-0.132713	0.021344	-0.008235	0.052289	0.043048	-0.481391	0.322008	-0.069757	0.367257	0.624439
		Smr	0.287992	0.30851	0.0039529	0.259903	0.602851	-0.206748	0.218831	-0.25725	-0.077596	-0.058131	-0.425428	0.20902
		Vm	-0.321201	-0.0812973	-0.112993	0.209332	0.04073	-0.453132	0.583924	0.175097	0.271306	0.340692	0.114538	-0.228523
		Spd	0.266611	-0.412086	-0.0374343	0.223977	-0.438476	0.238244	0.538817	-0.26499	-0.188476	-0.14399	-0.184356	0.0879064
		Spc	-0.323518	0.0081925	-0.0323121	0.335313	0.046229	-0.111313	-0.024293	0.2141	-0.777055	-0.038431	0.236208	0.244435
		FLTt	-0.329694	0.0550813	-0.112228	0.030095	0.026807	-0.126397	-0.061638	-0.534356	-0.129629	-0.445652	0.017546	-0.594154
		nMotif	0.293128	0.189791	-0.0098815	0.601237	0.119575	0.402232	-0.048146	-0.0070235	0.146251	0.095076	0.484151	-0.270526
		mea	-0.310954	-0.0627238	-0.165842	-0.296658	0.454958	0.644931	0.347194	0.165064	-0.058728	-0.043883	-0.048264	-0.073807
		metf	-0.317054	0.195197	-0.0055897	0.169682	-0.209718	0.26032	-0.183471	-0.287068	-0.093385	0.647633	-0.415678	-0.0616185
		medf	0.086986	-0.665369	-0.516932	0.127873	0.301382	-0.084342	-0.358197	-0.083085	0.029313	0.173417	-0.045406	-0.00022023
		Asfc	-0.31621	-0.008049	-0.054089	0.464453	-0.117607	0.103523	-0.158898	0.370111	0.349247	-0.438663	-0.411108	0.10544
		IsT	-0.174209	-0.447972	0.810424	0.119653	0.264192	0.027244	-0.067107	-0.127447	0.064426	0.044448	0.018277	-0.0110281
acid etching experiment	Standard deviation		2.24	1.717	1.193	0.9607	0.7844	0.6636	0.5243	0.3999	0.32558	0.23723	0.16784	0.08884
	Proportion of Variance		0.418	0.246	0.119	0.0769	0.0513	0.0367	0.0229	0.0133	0.00883	0.00469	0.00235	0.00066
	Cumulative Proportion		0.418	0.664	0.782	0.8593	0.9105	0.9472	0.9701	0.9835	0.99231	0.99699	0.99934	1
	Factor loadings	Sq	0.387519	-0.037436	0.18994	-0.352826	0.127268	-0.230605	0.07813	-0.321881	0.033318	-0.623522	0.26689	-0.218304
		Smr	-0.318549	-0.044453	-0.083902	0.0098301	-0.743885	-0.538514	0.044712	-0.189205	0.045286	-0.034191	0.056444	-0.0429947
		Vm	0.412662	-0.054555	7.1427e-05	0.115019	-0.168186	0.190491	0.043159	-0.706977	-0.078409	0.34473	-0.336854	-0.0937807
		Spd	-0.06721	0.522491	-0.15608	0.169418	0.236777	-0.173594	0.054799	-0.190839	0.734454	0.034369	-0.043812	-0.035749
		Spc	0.360388	-0.140161	-0.088964	0.47163	-0.223073	0.0029112	-0.137766	0.337569	0.164095	-0.443433	-0.448492	-0.112779
		FLTt	0.374291	-0.172972	-0.13867	0.398575	-0.129463	0.0526243	0.078864	0.086992	0.140226	0.22198	0.741332	-0.0081592
		nMotif	0.1	0.414851	-0.44854	0.201191	0.131641	-0.214816	0.450429	0.030542	-0.545743	-0.09396	-0.028089	-0.0384841
		mea	0.118157	-0.450534	-0.038486	0.0472258	0.433013	-0.681704	-0.06839	0.049046	0.004498	0.304639	-0.164095	-0.0170857
		metf	0.403254	0.12598	-0.079079	-0.321862	-0.169846	-0.115603	0.032041	0.125112	0.094559	0.041447	-0.077012	0.797612
		medf	0.090701	0.439411	0.34705	0.266839	0.021204	-0.221792	-0.65901	-0.064531	-0.308823	0.030034	0.125645	0.0829749
		Asfc	0.325851	0.271361	-0.048041	-0.445517	-0.205693	-0.0587907	-0.087641	0.390848	0.043889	0.353868	-0.05906	-0.53155
		IsT	0.050936	0.115817	0.75743	0.190253	-0.055948	-0.103664	0.557913	0.164074	0.024164	0.121025	-0.080954	0.0157663
